# Supplementary material for: Tetrad or triad? insights from a versatile Fe( ii ) structural and functional model of the 3-histidine 1-carboxylate tetrad in C–C bond cleaving dioxygenase enzymes
Source: Royal Society of Chemistry journal article supplement (doi:10.1039/d5ra09716a), 2026-01-01
Supplement: d5ra09716a1.pdf [file d5ra09716a1.pdf]

## Electronic Supplementary Information for:

### Tetrad or triad? Insights from a versatile Fe(II) structural and functional model of the 3-his 1-carboxylate tetrad in C-C bond cleaving dioxygenase enzymes

Adam Fadul;<sup>a</sup> Thomas Cundari <sup>b</sup> Jeffery Bertke;<sup>c</sup> Santiago A. Toledo <sup>a</sup>

a. Department of Chemistry, American University, 4400 Massachusetts Ave NW, Washington, DC, 20016, United States of America.

b. Department of Chemistry, University of North Texas, 1155 Union Cir, Denton, Texas 76203, United States of America.

c. Department of Chemistry, Georgetown University, 3700 O St NW, Washington, DC, 20057, United States of America.

| Supporting information table of contents                                                                                                       | page        |
|------------------------------------------------------------------------------------------------------------------------------------------------|-------------|
| <i>Characterization of complex 1</i>                                                                                                           | <b>5-8</b>  |
| <b>Figure S1:</b> <sup>1</sup> H NMR spectrum of complex <b>1</b> in CD <sub>3</sub> OD.                                                       |             |
| <b>Figure S2.</b> Quantitative UV-Visible spectrum of <b>1</b> in MeCN                                                                         |             |
| <b>Figure S3.</b> Cyclic voltammogram of complex <b>1</b> in MeCN                                                                              |             |
| <b>Figure S4.</b> Qualitative UV-Visible spectrum of <b>1</b> in MeOH                                                                          |             |
| <b>Image S1.</b> Elemental analysis results for <b>1</b> (C, H, N only)                                                                        |             |
| <b>Image S2.</b> ESI-MS of <b>1</b>                                                                                                            |             |
| <i>Biomimetic oxidative C-C bond cleaving reactivity and controls</i>                                                                          | <b>9-17</b> |
| <b>Figure S5:</b> Time-lapse UV-Visible spectrum showing dioxygenation C-C cleavage reaction of 3DHPD by <b>1</b> in MeCN.                     |             |
| <b>Figure S6:</b> UV-Visible spectra for qualitative carbon monoxide assay for the reaction of <b>1</b> with 3 eq. 3DHPD substrate in MeCN.    |             |
| <b>Figure S7:</b> UV-Visible spectrum of FlaH substrate in DMF under anerobic conditions following 20 hours of continuous oxygenation at 50°C. |             |

|                                                                                                                                                                                                     |              |
|-----------------------------------------------------------------------------------------------------------------------------------------------------------------------------------------------------|--------------|
| <b>Figure S8:</b> UV-Visible spectra for qualitative carbon monoxide assay for reaction of <b>1</b> with 1 eq. FlaH substrate in DMF under 20 hours of continuous oxygenation at 50°C.              |              |
| <b>Figure S9:</b> Quantitative <sup>1</sup> H-NMR spectrum from reaction of 1 eq. FlaH and excess O <sub>2</sub> at 50°C                                                                            |              |
| <b>Figure S10:</b> Paramagnetic <sup>1</sup> H-NMR of <b>1</b> following addition of 2HAPH substrate and NEt <sub>3</sub> under anaerobic conditions in CD <sub>3</sub> OD.                         |              |
| <b>Figure S11:</b> <sup>1</sup> H-NMR of the diamagnetic region of <b>1</b> in the presence of 2HAPH, O <sub>2</sub> and NEt <sub>3</sub> in CD <sub>3</sub> OD.                                    |              |
| <b>Image S3:</b> Images of anerobic <b>1</b> -2HAPH with NEt <sub>3</sub> and <b>1</b> -2HAPH after addition of O <sub>2</sub> .                                                                    |              |
| <b>Figure S12:</b> UV-Visible spectrum during the dioxygenation reaction of <b>1</b> -2HAPH in the presence of NEt <sub>3</sub> in CD <sub>3</sub> OD.                                              |              |
| <b>Figure S13:</b> Timelapse UV-Visible spectrum showing monitoring of the dioxygenation C-C cleavage reaction of 2HAPH mediated by <b>1</b> in MeCN at room temperature.                           |              |
| <b>Figure S14:</b> Time lapse, low-temperature UV-Visible spectrum of the reaction of <b>1</b> with 20 eq. 2HAPH, 2 eq. NEt <sub>3</sub> , and 0.5 eq. O <sub>2</sub> at -40°C in MeCN.             |              |
| <b>Figure S15:</b> Time lapse, low temperature UV-Visible spectrum of the reaction of <b>1</b> with 20 eq. 2HAPH, 2 eq. NEt <sub>3</sub> , and 0.5 eq. O <sub>2</sub> at -80°C in Acetone.          |              |
| <b>Figure S16:</b> Quantitative <sup>1</sup> H-NMR spectrum from the reaction of 1 eq. 2HAPH, 1 eq. NEt <sub>3</sub> , and excess O <sub>2</sub> after spiking with 27.9 mg 1,3,5-trimethoxybenzne. |              |
| <i>Synthesis, characterization, and reactivity of the ferric analogue of <b>1</b> and ferric <math>\mu</math>-oxo dimer</i>                                                                         | <b>18-28</b> |
| <b>Figure S17:</b> UV-Visible spectrum of complex <b>1</b> with Magic Blue in the presence of 1 eqv. Benzoate, 20 eqv. 2HAPH, and without substrate in MeCN.                                        |              |
| <b>Scheme S1:</b> Synthetic scheme for the ferric analog of <b>1</b> .                                                                                                                              |              |

|                                                                                                                                                               |              |
|---------------------------------------------------------------------------------------------------------------------------------------------------------------|--------------|
| <b>Figure S18:</b> UV-Visible spectrum of independently synthesized ferric analog of <b>1</b> in MeCN.                                                        |              |
| <b>Figure S19:</b> UV-Visible spectrum of ferric analog of <b>1</b> upon addition of tetrabutylammonium benzoate in MeCN.                                     |              |
| <b>Figure S20:</b> UV-Visible spectrum of ferric analog of <b>1</b> upon addition of 5 eq. 2HAPH and 2 eq. NEt <sub>3</sub> in MeCN.                          |              |
| <b>Image S4:</b> ESI-MS of an authentic powder sample of the synthesized ferric analog of <b>1</b> .                                                          |              |
| <b>Figure S21:</b> UV-vis spectrum of <b>1</b> under anaerobic conditions and excess O <sub>2</sub> in MeCN.                                                  |              |
| <b>Figure S22:</b> ORTEP representations of the crystal structure of ferric $\mu$ -oxo dimer derived from reactions of <b>1</b> and O <sub>2</sub> .          |              |
| <b>Synthetic description of Fe<sub>2</sub>(N<sub>3</sub>O<sub>2</sub>)-<math>\mu</math>-O](OTf)<sub>2</sub>, <math>\mu</math>-oxo dimer</b>                   |              |
| <b>Image S5:</b> ESI-MS of ferric $\mu$ -oxo dimer isolated as a clean powder, which was derived from the reaction of <b>1</b> with O <sub>2</sub> .          |              |
| <b>Figure S23:</b> Time lapse, low temperature UV-Visible spectrum of the reaction of <b>1</b> with 1 eq. mCPBA at -40°C in MeCN.                             |              |
| <b>Figure S24:</b> Time lapse, low temperature UV-Visible spectrum of the reaction of <b>1</b> with 6 eq. mCPBA at -80°C in Acetone. Panels A, B, C.          |              |
| <b>Figure S25:</b> Time lapse, low temperature UV-Visible spectrum of the reaction of <b>1</b> with <u>excess O<sub>2</sub></u> at -40°C in MeCN.             |              |
| <b>Figure S26:</b> Time lapse (2.5 min), low temperature UV-Visible spectrum of the reaction of <b>1</b> with <u>0.5 eq. O<sub>2</sub></u> at -40°C in MeCN.  |              |
| <b>Figure S27:</b> Time lapse (2.5 min), low temperature UV-Visible spectrum of the reaction of <b>1</b> with <u>1 eq. O<sub>2</sub></u> at -80°C in Acetone. |              |
| <i>Computational calculations</i>                                                                                                                             | <b>29-32</b> |
| <b>Figure S28:</b> Proposed DFT-derived mechanism of O <sub>2</sub> activation and C-C bond cleaving of 2-HAPH.                                               |              |

|                                                                                                                                                                                                     |              |
|-----------------------------------------------------------------------------------------------------------------------------------------------------------------------------------------------------|--------------|
| <b>Figure S29:</b> Core geometry of cationic Fe(N <sub>3</sub> O)(2HAPH) complex                                                                                                                    |              |
| <b>Figure S30:</b> Calculated spin density for the Fe <sup>III</sup> -superoxide complex                                                                                                            |              |
| <b>Figure S31:</b> Calculated geometry for <b>1</b> bound to 2HAP <sup>-</sup> in a k-1 configuration. The bond length between the Fe(II) and the NMe <sub>2</sub> moiety of the ligand is 2.373 Å. |              |
| <b>Figure S32:</b> Calculated structures for the key intermediates resulting from the reaction between compound <b>1</b> and O <sub>2</sub> .                                                       |              |
| <i>X-ray crystallographic studies</i>                                                                                                                                                               | <b>32-35</b> |
| <b>Table S1:</b> Summary of X-ray crystallographic data for <b>1</b>                                                                                                                                |              |
| <b>Figure S33:</b> ORTEP representations of the crystal structure of complex <b>1</b>                                                                                                               |              |
| <b>Table S2:</b> Summary of X-ray crystallographic data for ferric-μ-oxo dimer.                                                                                                                     |              |



## Characterization of complex 1

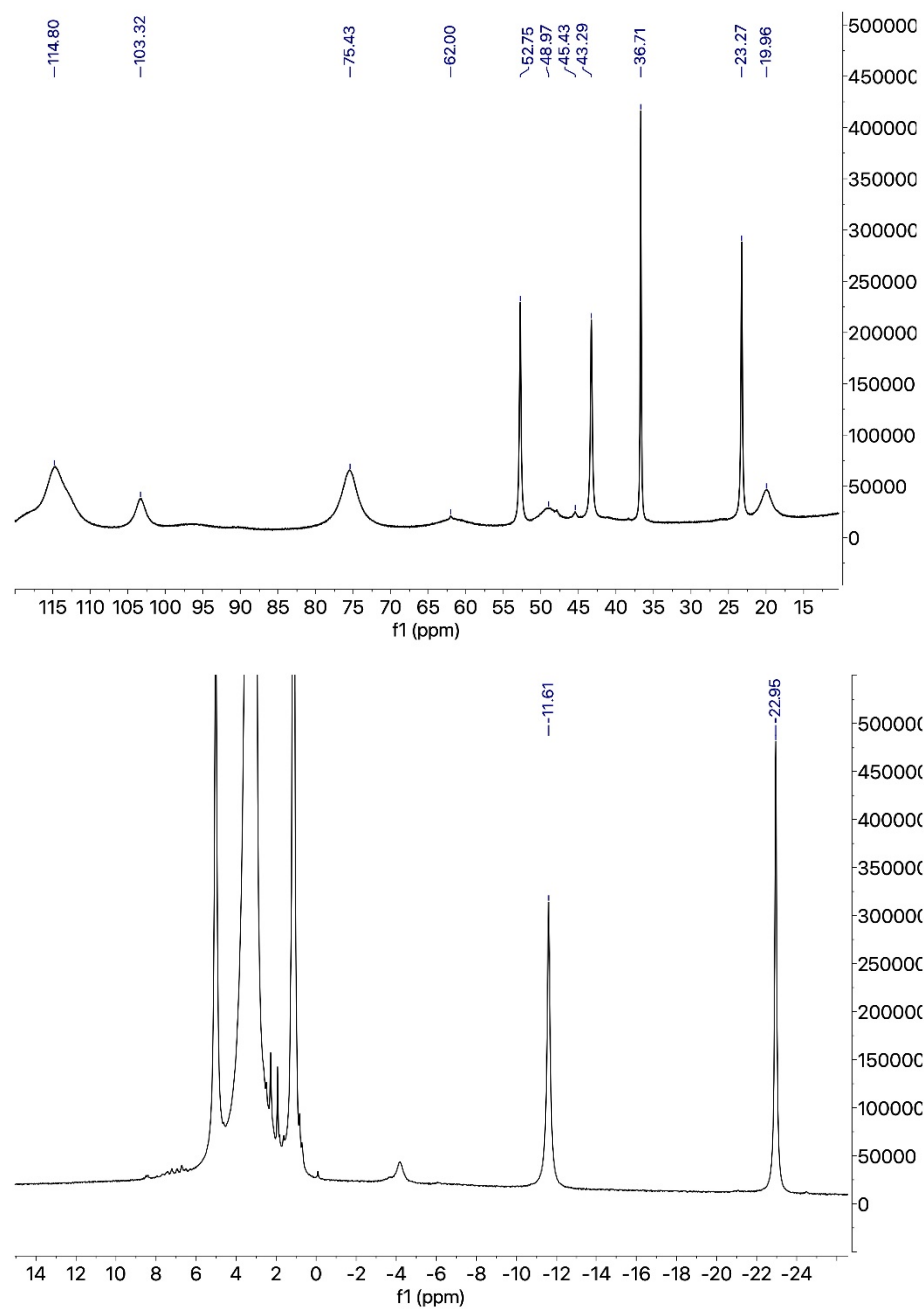

**Figure S1:** Paramagnetic  $^1\text{H}$ -NMR of **1** in  $\text{CD}_3\text{OD}$  under anaerobic conditions.

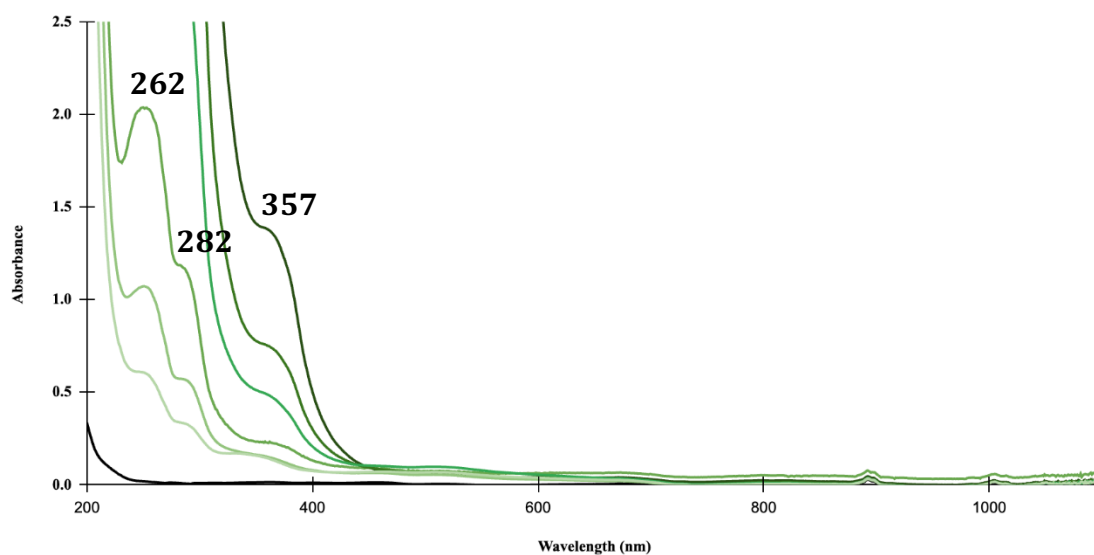

**Figure S2:** Quantitative UV-Visible spectrum of **1** in MeCN. Characteristic absorption shoulders are apparent at 357 nm and 282 nm. An absorption peak is also observed at 262 nm. The following molar extinction coefficients were obtained:  $\epsilon_{357} = 641 \text{ M}^{-1}\text{cm}^{-1}$ ,  $\epsilon_{282} = 5740 \text{ M}^{-1}\text{cm}^{-1}$ , and  $\epsilon_{262} = 9360 \text{ M}^{-1}\text{cm}^{-1}$ .

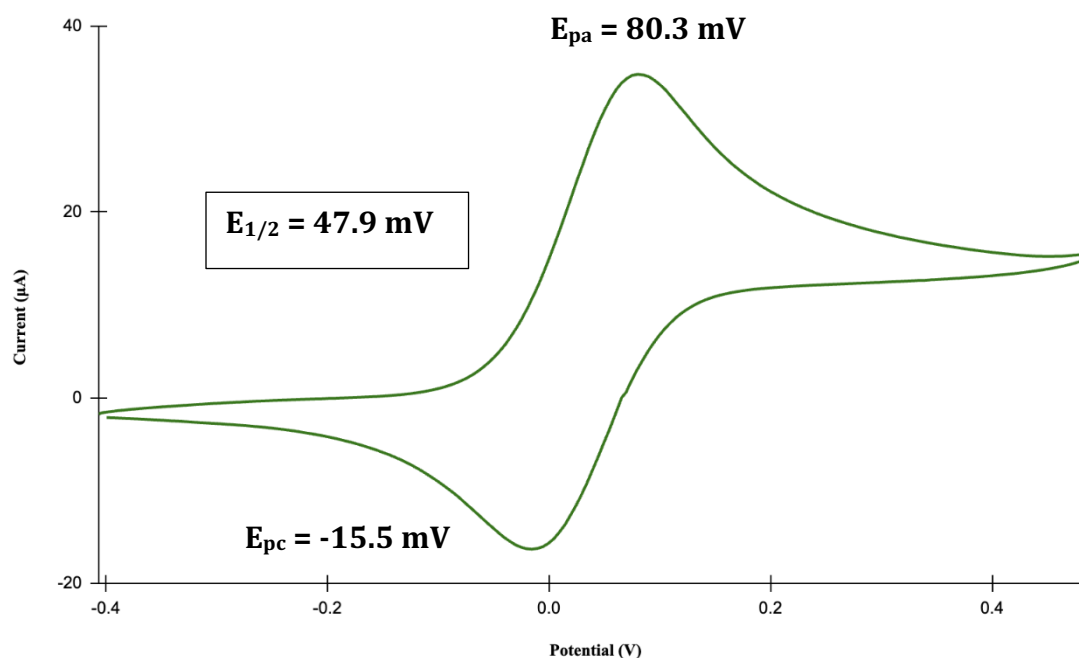

**Figure S3:** Cyclic voltammogram for complex **1** in MeCN (1.5mM) containing  $[\text{NBu}_4][\text{PF}_6]$  (0.1M) as the supporting electrolyte. Scan rate 250 mV/sec. Potentials reported vs.  $\text{Fc}/\text{Fc}^+$ .

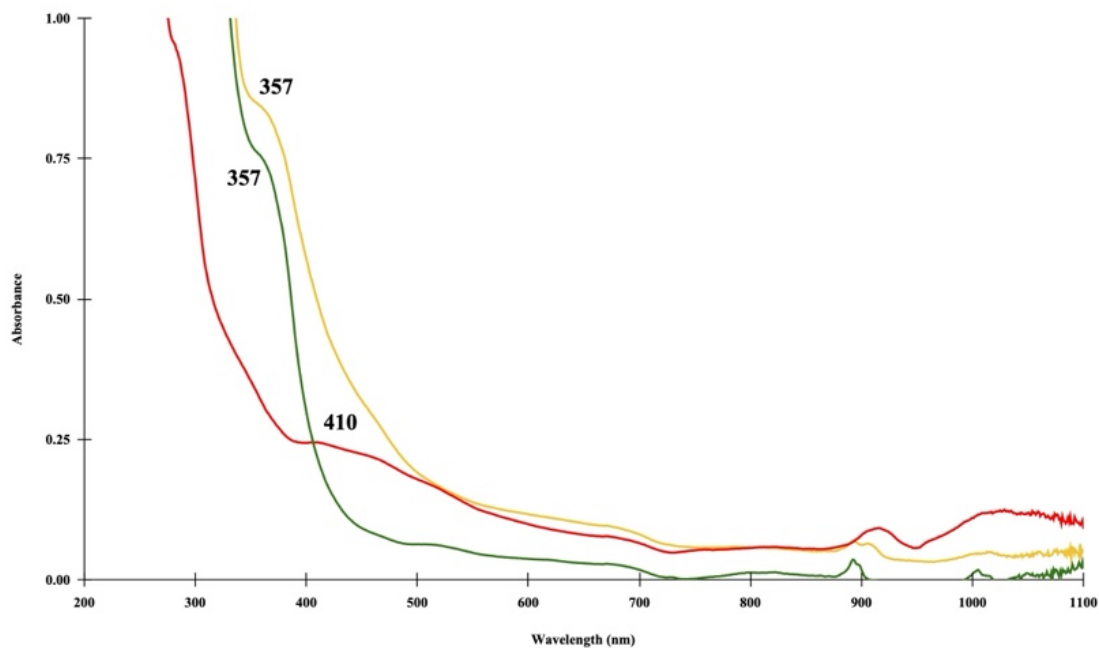

**Figure S4:** UV-vis spectrum of **1** under anaerobic conditions in MeCN, Acetone, and MeOH (green, yellow, and red traces respectively).

**Atlantic Microlab, Inc.**

Sample No. Fe N<sub>3</sub>O SAT Company/School American University  
 6180 Atlantic Blvd. Suite M Dept. Chemistry  
 Norcross, GA 30071 Address 4400 Massachusetts Ave NW  
 www.atlanticmicrolab.com City, State, Zip Washington DC, 20016  
 Professor/Supervisor: Santiago Toledo Name Santiago Toledo Date 09/23/25  
 PO# / CC# Phone 302.885.7496

| Element | Theory | Found | Single <input checked="" type="checkbox"/> Duplicate <input type="checkbox"/>                                                                                                                                                                                                                                                                                                                                                                                                                                                                |
|---------|--------|-------|----------------------------------------------------------------------------------------------------------------------------------------------------------------------------------------------------------------------------------------------------------------------------------------------------------------------------------------------------------------------------------------------------------------------------------------------------------------------------------------------------------------------------------------------|
| C       | 47.29  | 46.89 | Elements Present: <u>Fe, C, N, H, S, O, F</u><br>Analyze for: <u>C, H, N</u><br>Hygroscopic <input checked="" type="checkbox"/> Explosive <input type="checkbox"/><br>M.P. _____ B.P. _____<br>To be dried: Yes <input type="checkbox"/> No <input checked="" type="checkbox"/><br>Temp. _____ Vac. _____ Time _____<br>Rush Service <input type="checkbox"/> Rush service guarantees analyses will be completed and results available by 5 PM EST on the day the sample is received by 11 AM.<br>Include Email Address or FAX # Below _____ |
| H       | 5.68   | 5.36  |                                                                                                                                                                                                                                                                                                                                                                                                                                                                                                                                              |
| N       | 7.88   | 7.34  |                                                                                                                                                                                                                                                                                                                                                                                                                                                                                                                                              |
|         |        |       |                                                                                                                                                                                                                                                                                                                                                                                                                                                                                                                                              |
|         |        |       |                                                                                                                                                                                                                                                                                                                                                                                                                                                                                                                                              |

Date Received SEP 24 2025 Date Completed SEP 25 2025  
 Remarks: Very air (O<sub>2</sub>) sensitive + Moisture sensitive MW 533.38 g/mol

**Image S1:** Elemental analysis results for **1** (C, H, N only).

## Generic Display Report

### Analysis Info

Analysis Name D:\Data\YL2025A\Q20250929\_TlabA\_1-A\_1\_2\_11402.d  
Method YL\_LCp\_100\_1000\_20250218a.m  
Sample Name Q20250929\_TlabA  
Comment

Acquisition Date 9/29/2025 12:07:50 PM

Operator Demo User  
Instrument maxis II

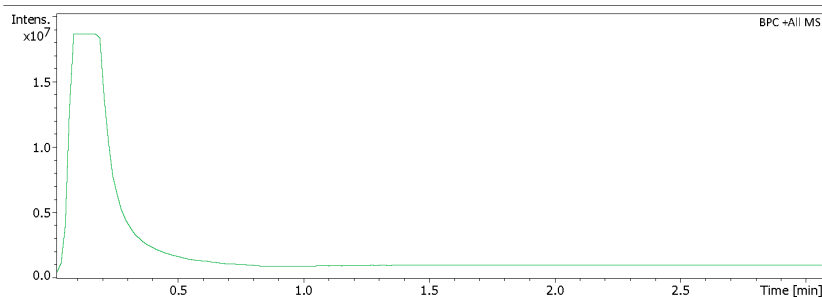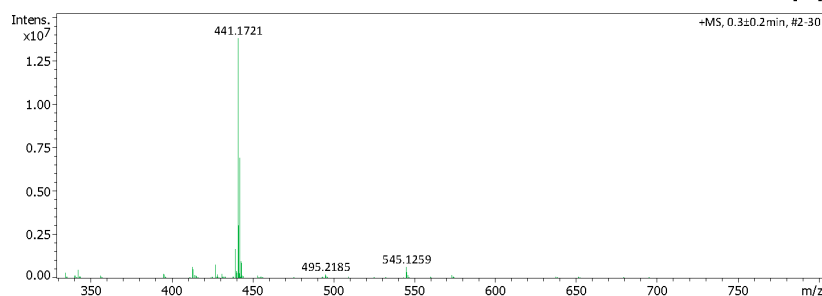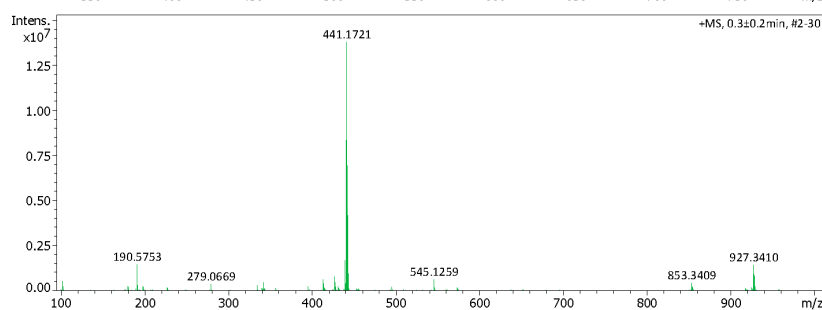

Bruker Compass DataAnalysis 6.0

printed: 9/29/2025 2:08:23 PM

by: demo

Page 1 of 1

**Image S2:** ESI-MS of **1**. The calculated mass for **1** is 545.3 g/mol. The pentacoordinate complex **1** without the bound triflate counterion is 396.3 g/mol. The most prominent peak in the ESI above shows a peak at 441.1721 m/z and a minor peak at 545.1259 m/z. The first one corresponds to the addition of a mass of 45 mass units, which we attribute to the binding of formate (45 g/mol) to a ferric version of complex **1**. This formulation will give the complex a charge of +1, showing the observed m/z. This apparent oxidation would be expected given the sensitivity of **1** to reacting with O<sub>2</sub>. Similarly, the m/z at 545 indicates a ferric triflate-bound complex, which would have a charge of +1. The presence of formate is not unusual in the spectrometer that is normally connected to an LC instrument.

## Biomimetic oxidative C-C bond cleaving reactivity and general oxidative reactivity controls

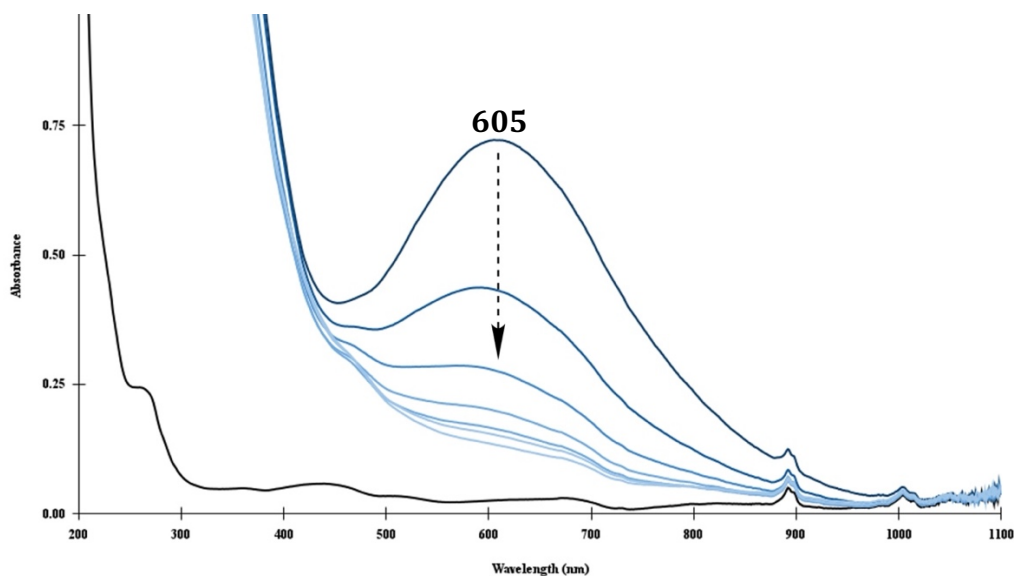

**Figure S5:** Time-lapse UV-Visible spectrum showing monitoring the 605 nm band of the dioxygenation C-C cleavage reaction of 3DHPD mediated by **1** in MeCN at room temperature. UV-Visible traces were recorded 3, 4.5, 6.5, 8, 9.5, 11, and 14 hours post oxygenation (blue traces of decreasing darkness).

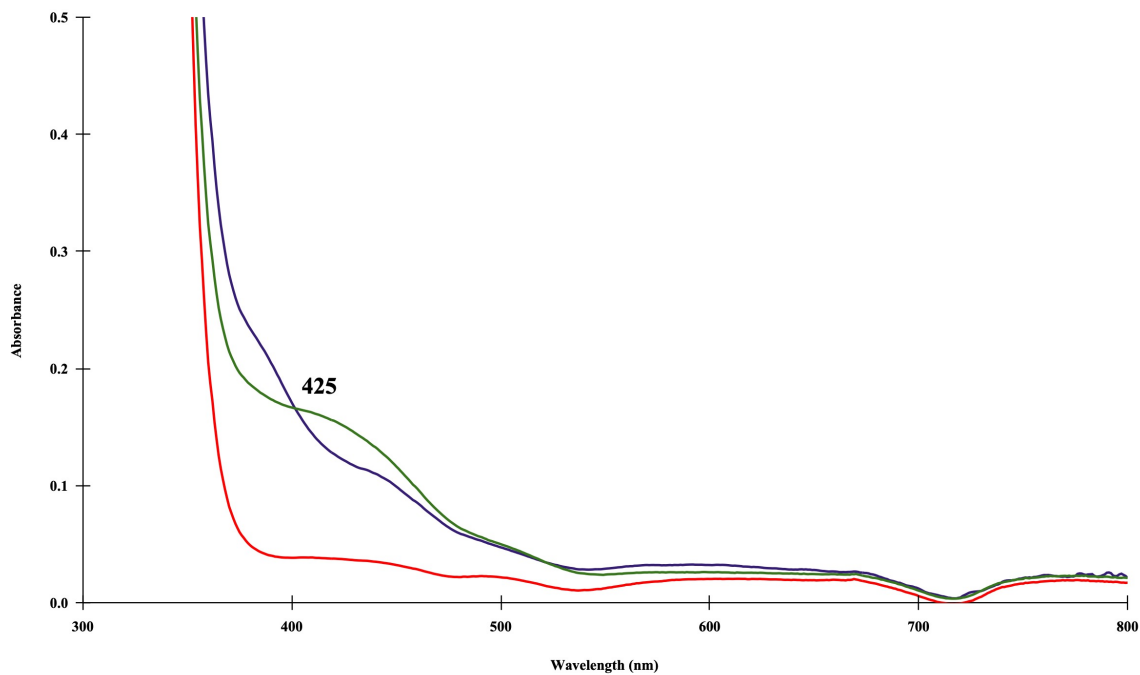

**Figure S6:** UV-Visible spectra for qualitative carbon monoxide assay for the reaction of **1** with 3 eq. 3DHPD substrate in MeCN following 5 minutes of oxygenation. Spectra:

negative control (red trace), positive control showing presence of the 425 nm expected shoulder (green trace), and carbon monoxide assay for the reaction (purple trace).

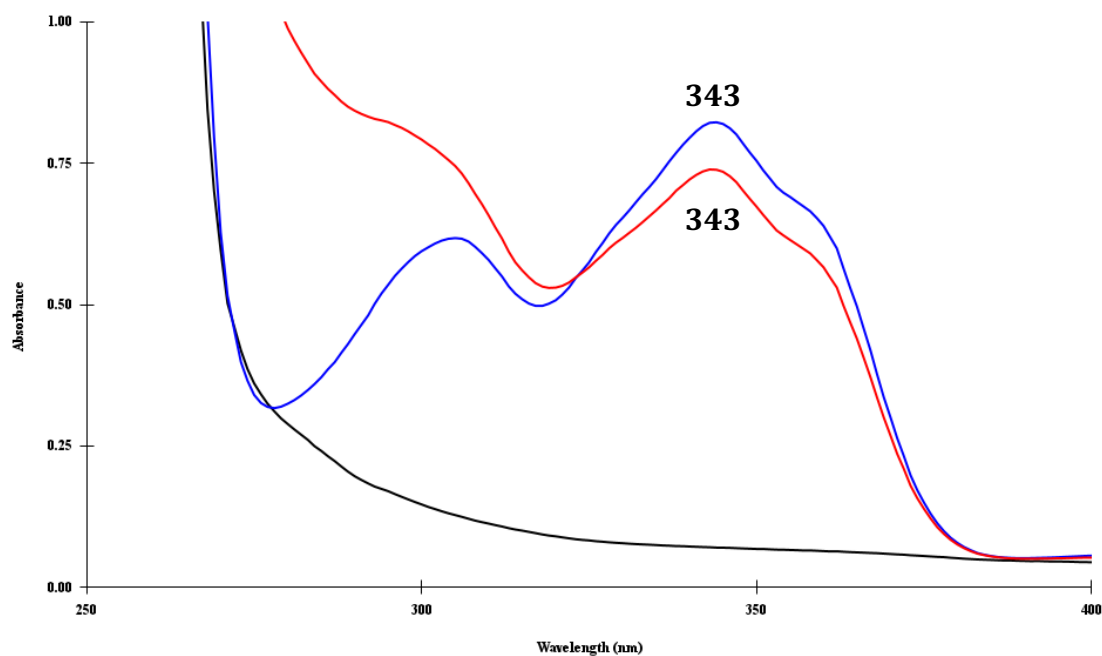

**Figure S7:** UV-Visible spectrum of FlaH substrate in DMF (black trace) under anerobic conditions (blue trace) and following 20 hours of continuous oxygenation at 50°C (red trace).

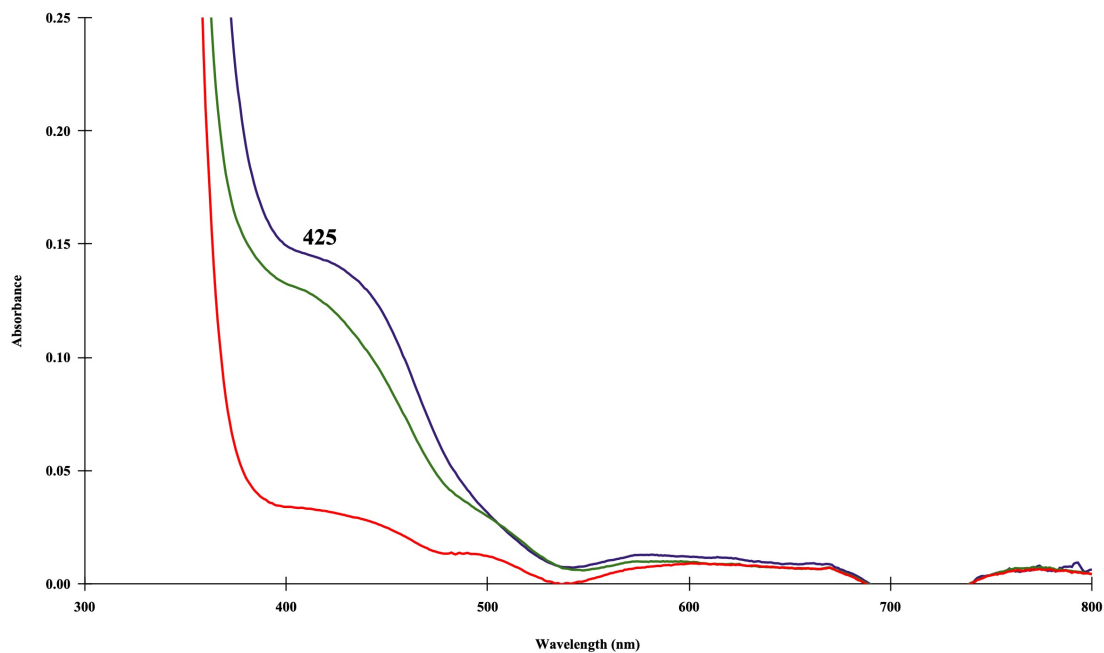

**Figure S8:** UV-Visible spectra for qualitative carbon monoxide assay for reaction of **1** with 1 eq. FlaH substrate in DMF under 20 hours of continuous oxygenation at 50°C. Spectra: negative control (red trace), positive control (green trace), and carbon monoxide assay for reaction (purple trace).

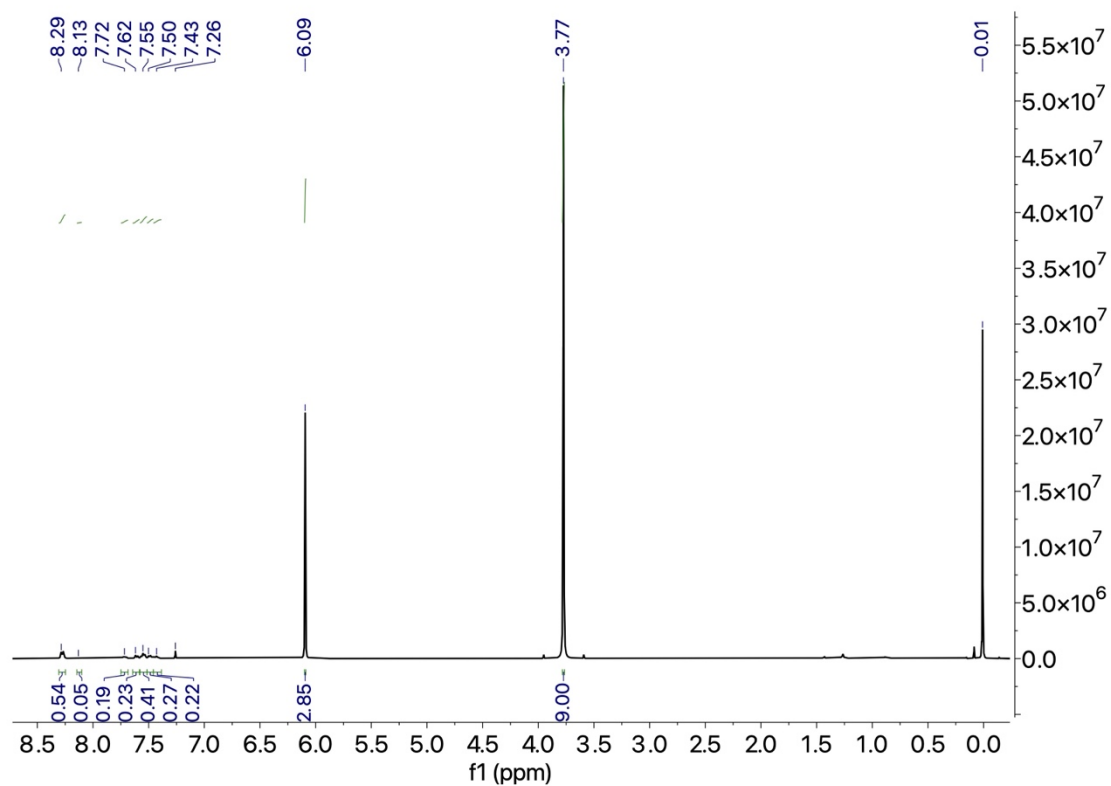

**Figure S9:** Quantitative  $^1\text{H}$ -NMR spectrum from reaction of 1 eq. FlaH and excess  $\text{O}_2$  at  $50^\circ\text{C}$  after spiking with 34.7 mg 1,3,5-trimethoxybenzene. The yield of the depside o-benzoyl salicylate was 88.5%.



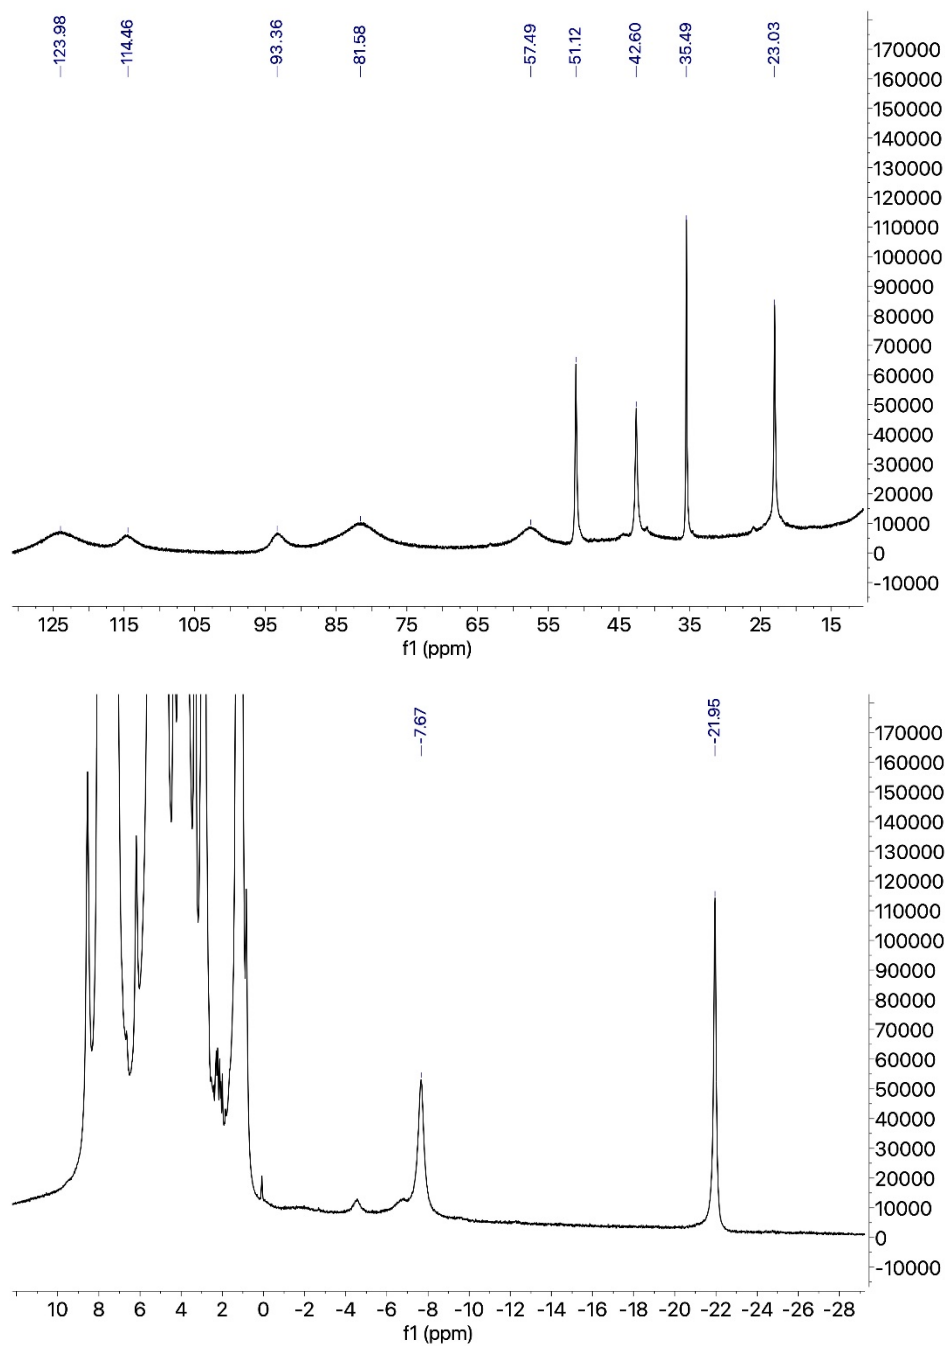

**Figure S10:** Paramagnetic  $^1\text{H}$ -NMR of **1** following addition of 2HAPH substrate and  $\text{NEt}_3$  under anaerobic conditions in  $\text{CD}_3\text{OD}$ .

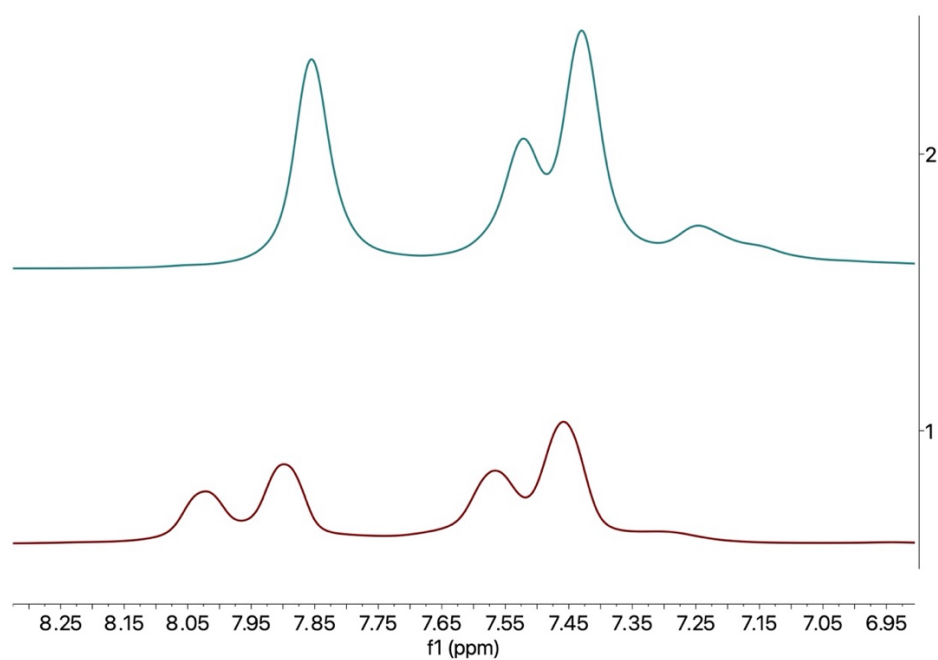

**Figure S11:**  $^1\text{H}$ -NMR of the diamagnetic region of **1** in the presence of 2HAPH and  $\text{NEt}_3$  before (top trace) and after (bottom trace) addition of  $\text{O}_2$  in  $\text{CD}_3\text{OD}$ .

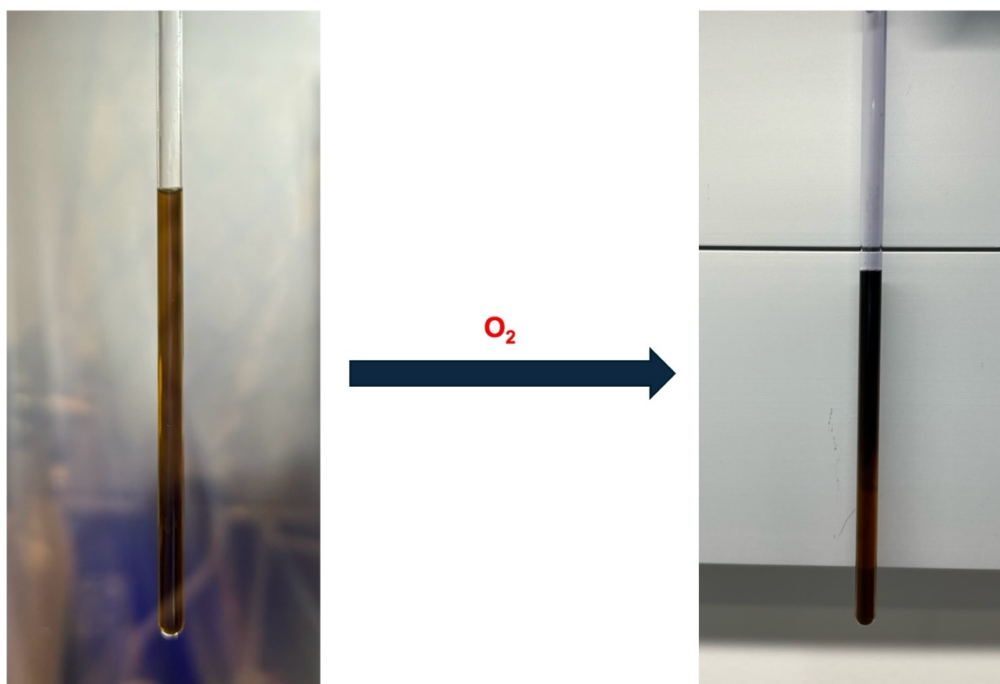

**Image S3:** Images of anerobic **1**-2HAPH (left) with  $\text{NEt}_3$  and **1**-2HAPH after addition of  $\text{O}_2$  (right).

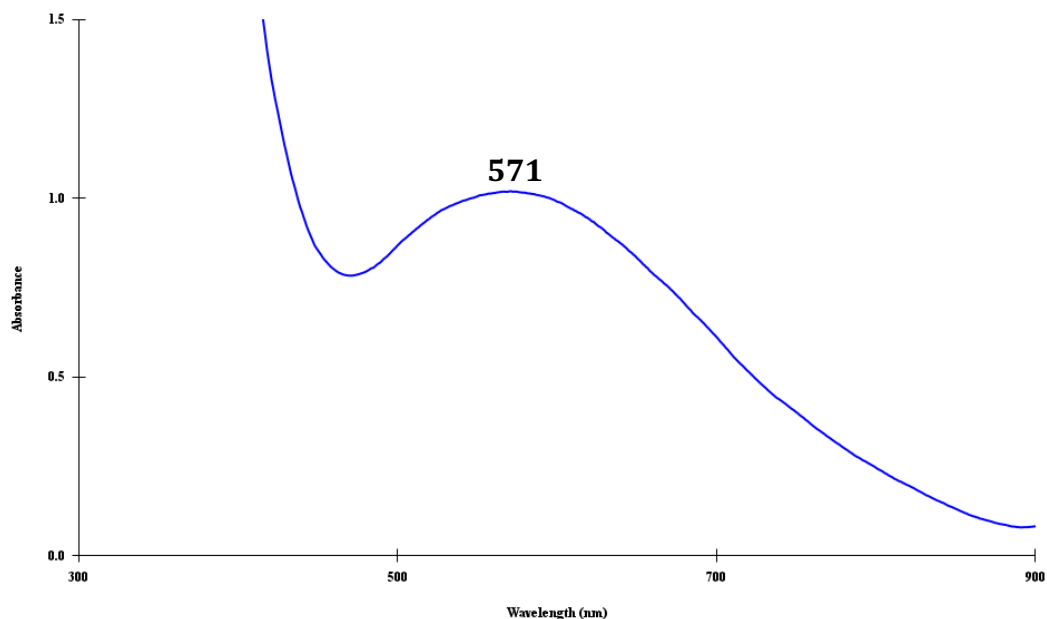

**Figure S12:** UV-Visible spectrum during the dioxygenation reaction of 1-2HAPH in the presence of  $\text{NEt}_3$  in  $\text{CD}_3\text{OD}$  (aliquot from NMR experiment).

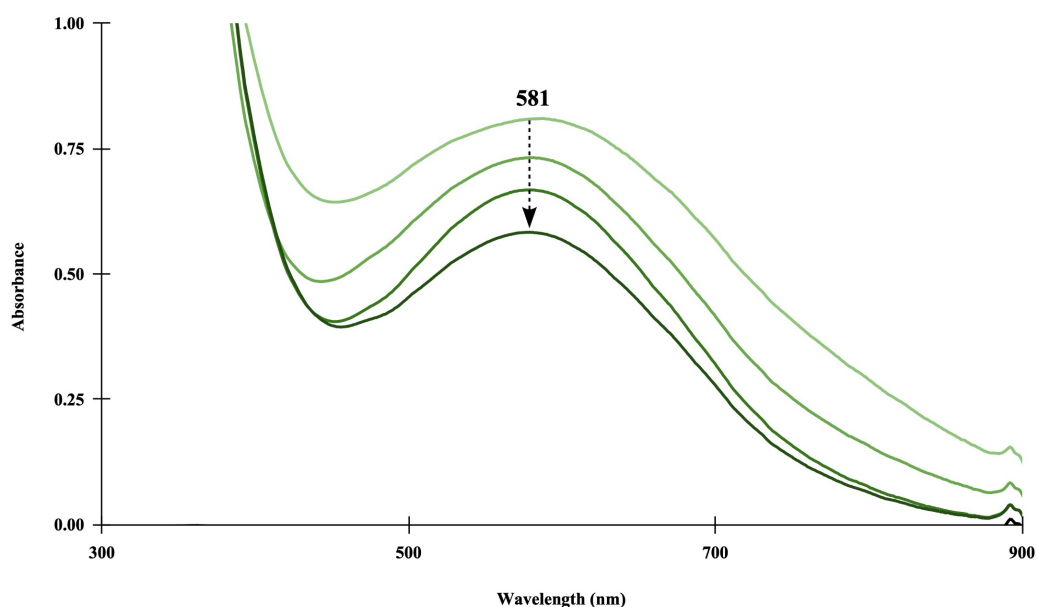

**Figure S13:** Timelapse UV-Visible spectrum showing monitoring the 581 nm band of the dioxygenation C-C cleavage reaction of 2HAPH mediated by **1** in MeCN at room temperature. UV-Visible traces were recorded at 6.5, 21, 52, and 72 hours post-oxygenation (green traces, increasing in darkness).

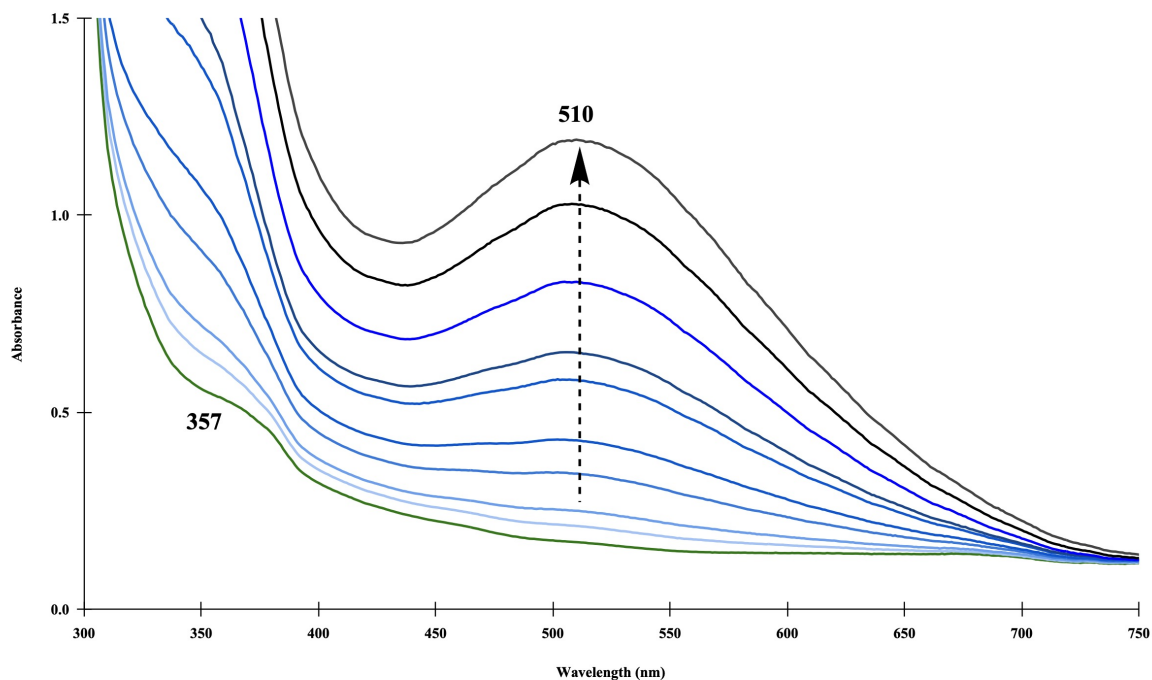

**Figure S14:** Time lapse (160 min), low temperature UV-Visible spectrum of the reaction of **1** with 20 eq. 2HAPH, 2 eq.  $\text{NEt}_3$ , and 0.5 eq.  $\text{O}_2$  at  $-40^\circ\text{C}$  in MeCN. Reaction temperature was gradually raised to  $25^\circ\text{C}$  after 100 minutes.

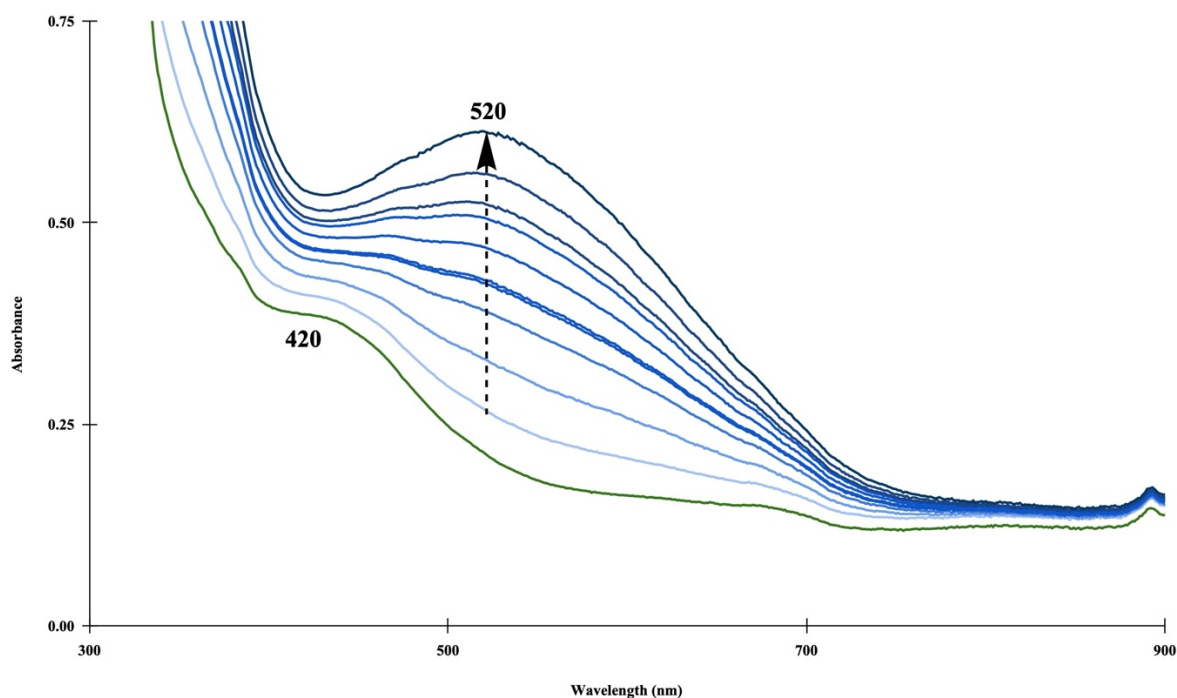

**Figure S15:** Time lapse (20 min), low temperature UV-Visible spectrum of the reaction of **1** with 20 eq. 2HAPH, 2 eq.  $\text{NEt}_3$ , and 10 eq.  $\text{O}_2$  at  $-80^\circ\text{C}$  in Acetone.

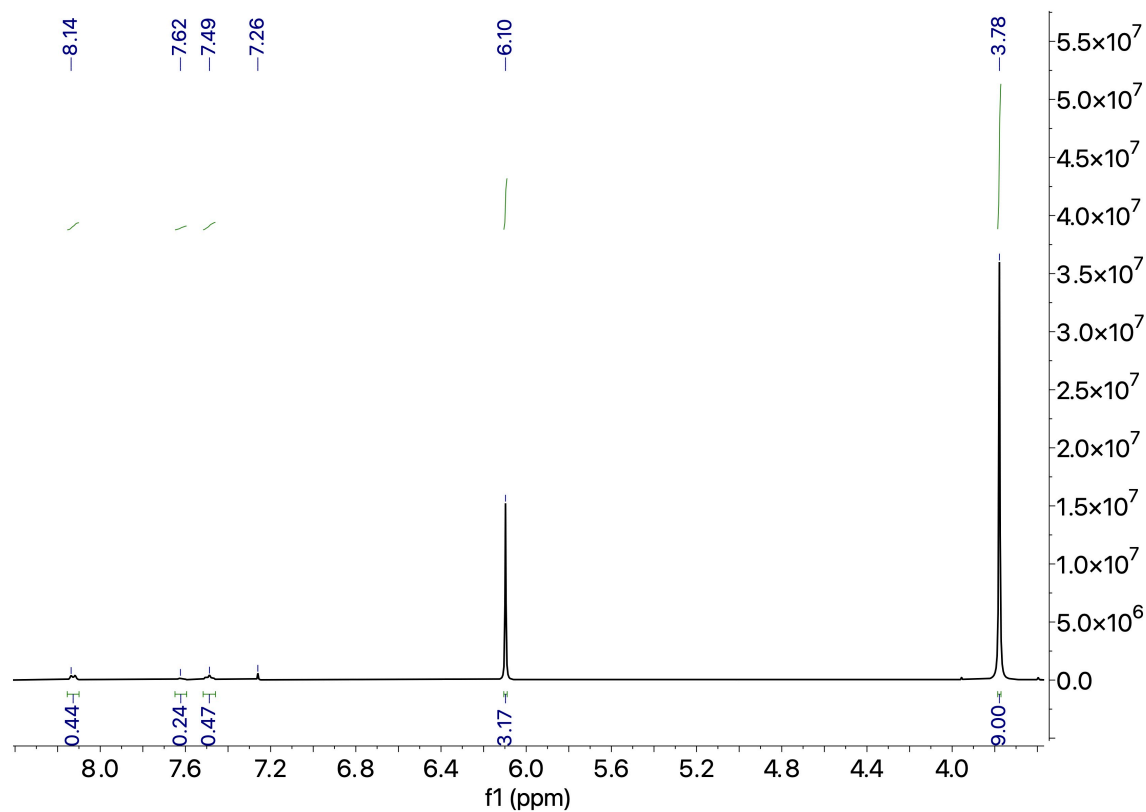

**Figure S16:** Quantitative  $^1\text{H}$ -NMR spectrum from the reaction of 1 eq. 2HAPH, 1 eq.  $\text{NEt}_3$ , and excess  $\text{O}_2$  after spiking with 27.9 mg 1,3,5-trimethoxybenzene. The yield of benzoic acid was 66.2%.

## Synthesis, characterization, and reactivity of the ferric analogue of 1 and ferric $\mu$ -oxo dimer

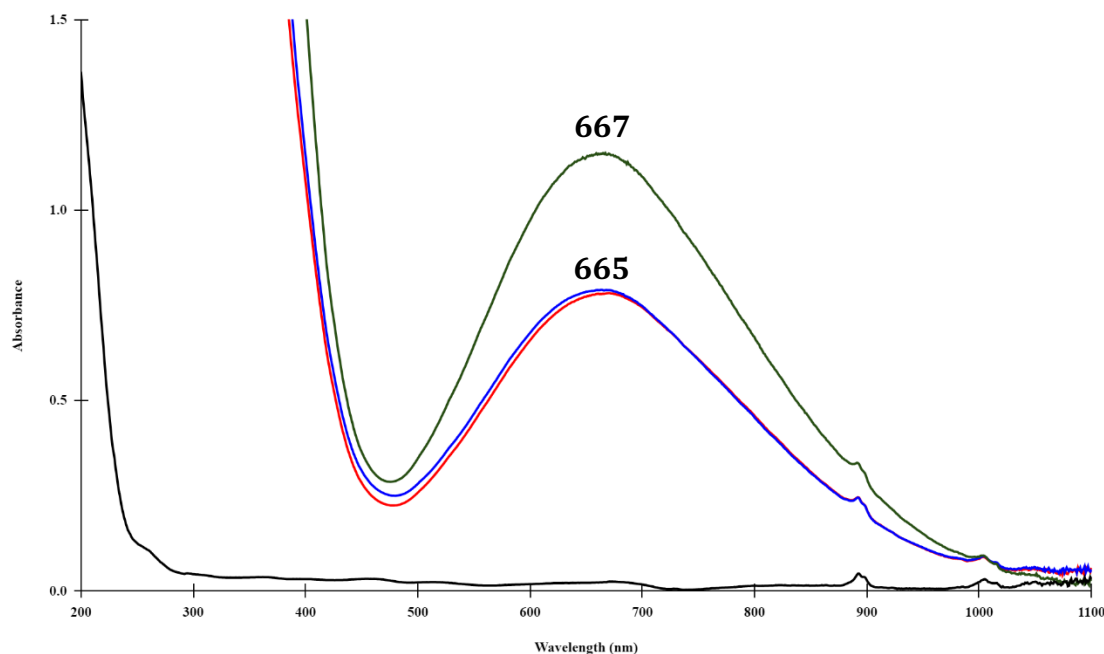

**Figure S17:** UV-Visible spectrum of complex **1** with Magic Blue in the presence of 1 eqv. Benzoate (green trace), 20 eqv. 2HAPH (blue trace), and without substrate (red trace) in MeCN.

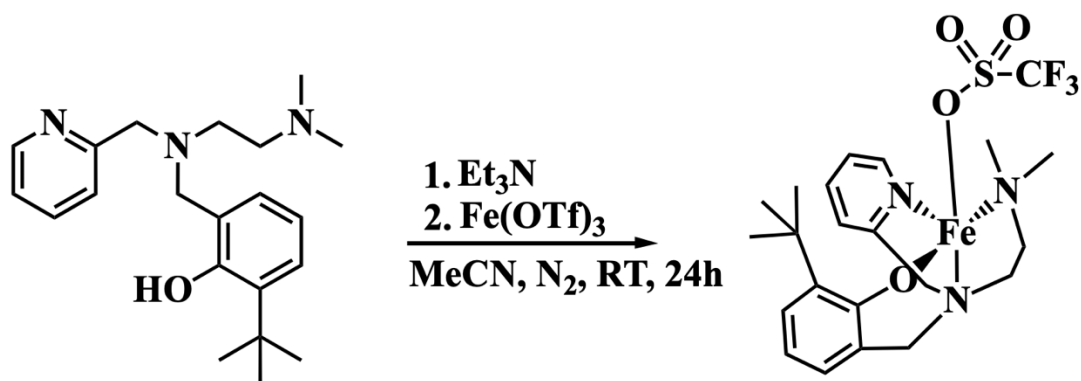

**Scheme S1:** Synthetic scheme for the ferric analog of **1**. The synthesis and purification of this compound were performed identically to that of **1**, except for the use of  $\text{Fe}(\text{OTf})_3$  in place of  $\text{Fe}(\text{OTf})_2$ . The product is a deep blue powder in good yields.

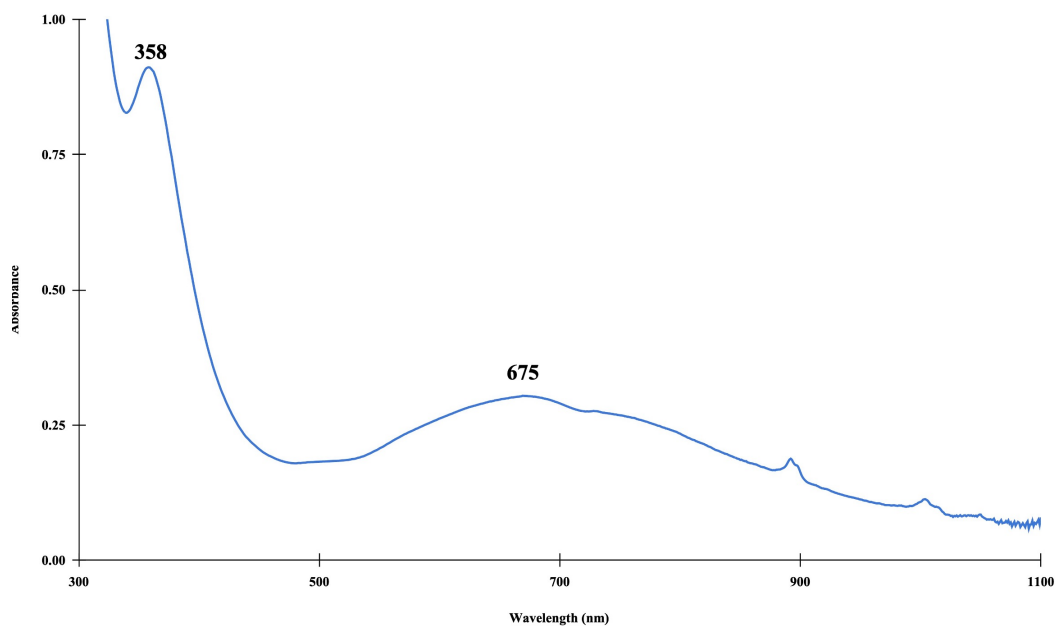

**Figure S18:** UV-Visible spectrum of independently synthesized ferric analog of **1** in MeCN.

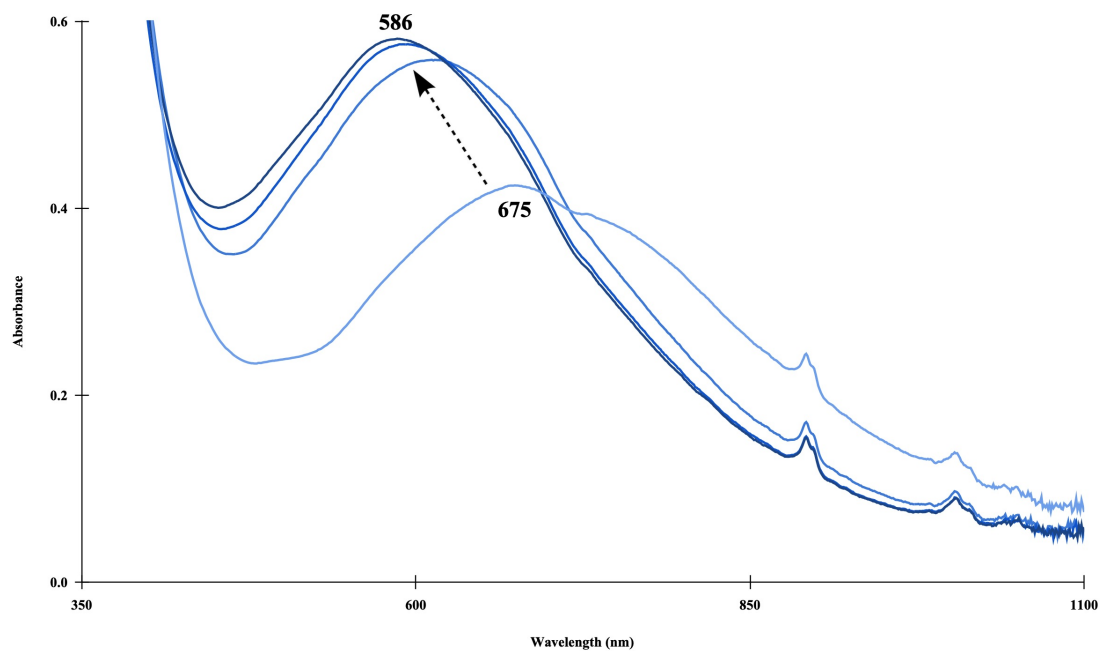

**Figure S19:** UV-Visible spectrum of ferric analog of **1** upon addition of tetrabutylammonium benzoate (1, 5, and 10 equivalents) in MeCN.

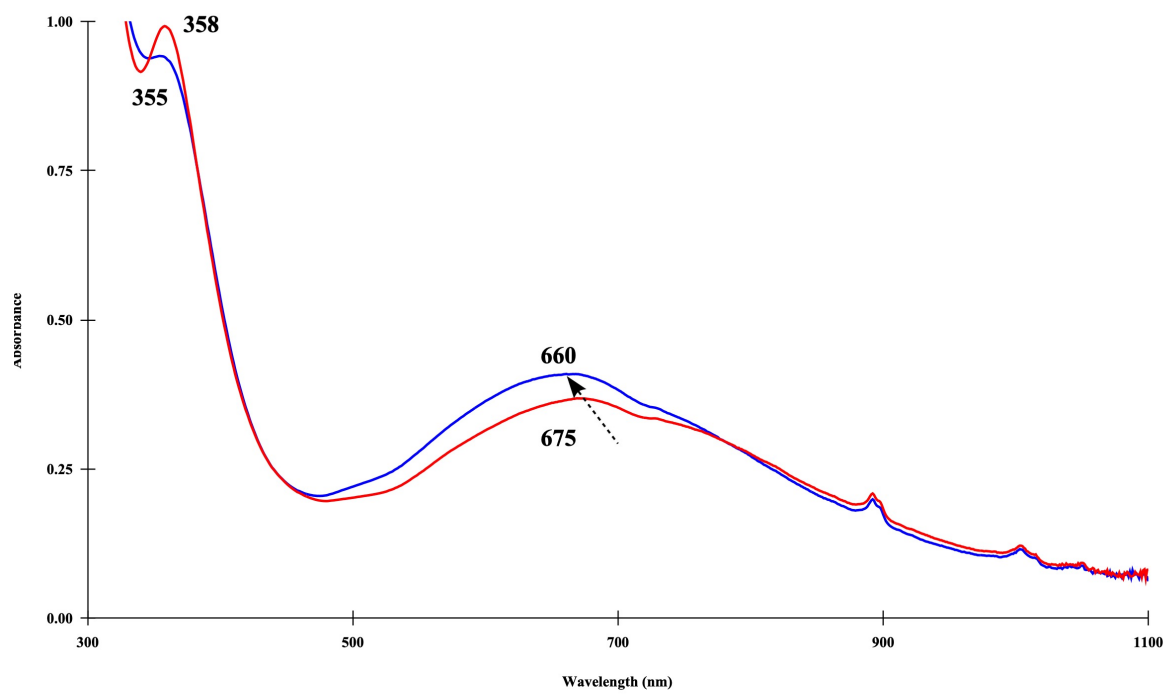

**Figure S20:** UV-Visible spectrum of ferric analog of **1** (red trace) upon addition of 5 eq. 2HAPH and 2 eq. NEt<sub>3</sub> in MeCN (blue trace).



## Generic Display Report

### Analysis Info

Analysis Name D:\Data\YL2025A\Q20251211\_FerricN2O\_2-C\_1\_1\_12076.d  
Method YL\_LCp\_100\_1000\_20250218a.m  
Sample Name Q20251211\_FerricN2O  
Comment

Acquisition Date 12/11/2025 3:44:02 PM

Operator Demo User  
Instrument maxis II

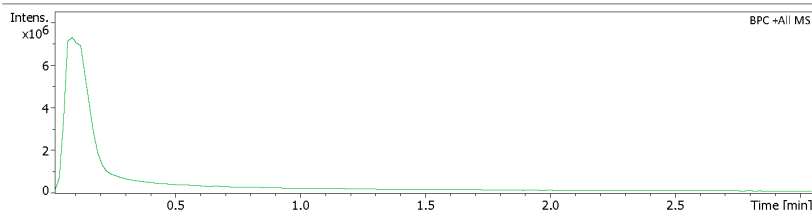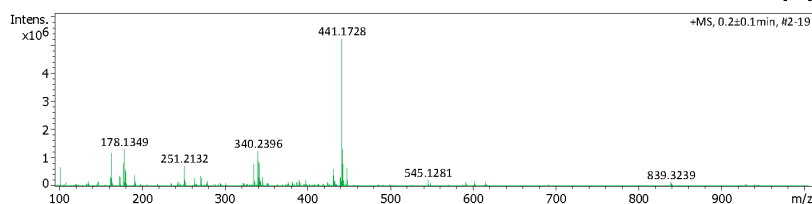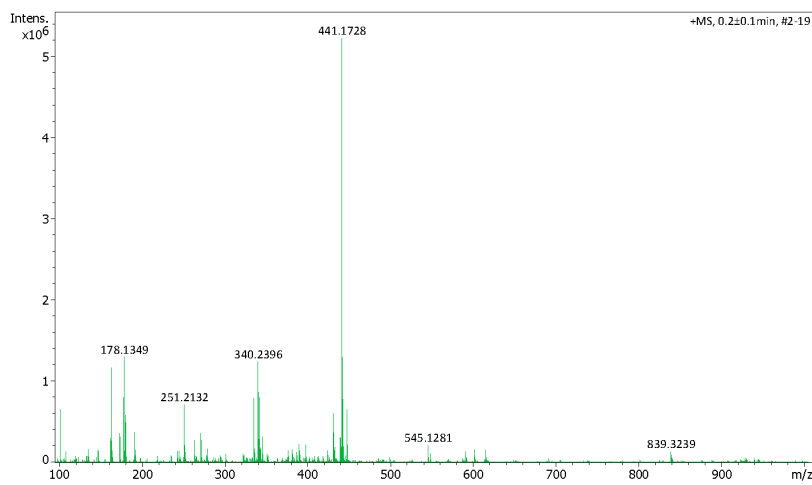

Bruker Compass DataAnalysis 6.0

printed: 12/11/2025 4:09:31 PM

by: demo

Page 1 of 1

**Image S4:** ESI-MS of an authentic powder sample of the synthesized ferric analog of **1**. The calculated mass for the ferric analogue of **1** is 545.3 g/mol. The most prominent peak in the ESI above shows a peak at 441.1728 m/z and a minor peak at 545.1259 m/z. Similar to the ESI of **1** (Image S2), the first one corresponds to the addition of a mass of 45 mass units, which we attribute to the binding of formate (45 g/mol) to the ferric analogue of **1**. The m/z at 545 indicates a ferric triflate-bound complex. The presence of formate is not unusual in the spectrometer that is normally connected to an LC instrument.

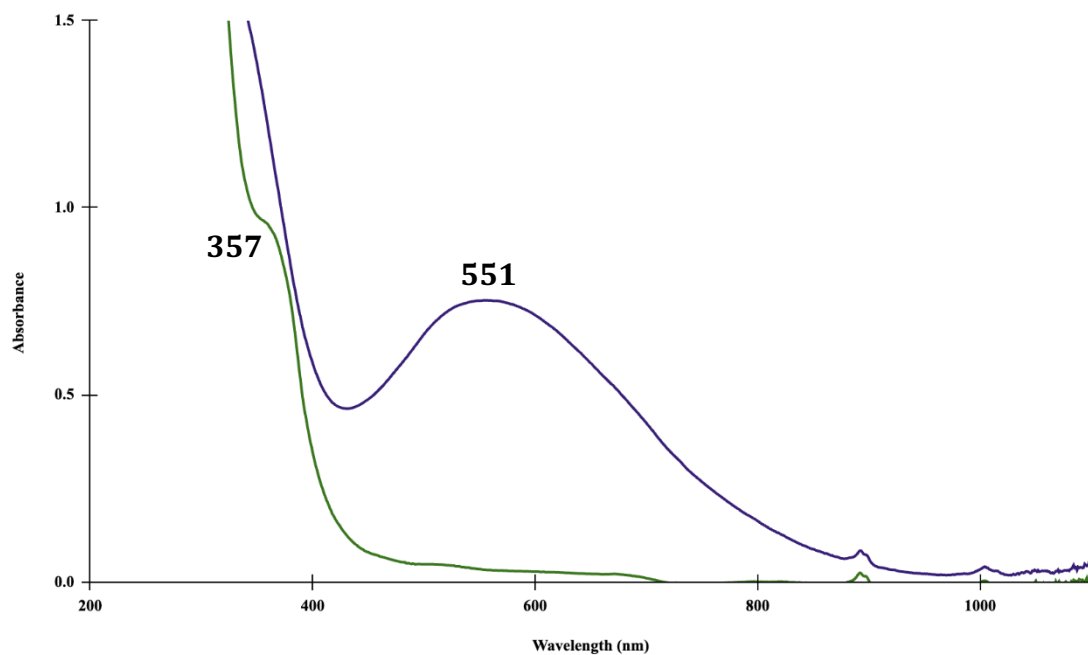

**Figure S21:** UV-vis spectrum of **1** under anaerobic conditions (green) and excess O<sub>2</sub> (purple) in MeCN. This reaction yields a purple species that is indefinitely stable at room temperature.

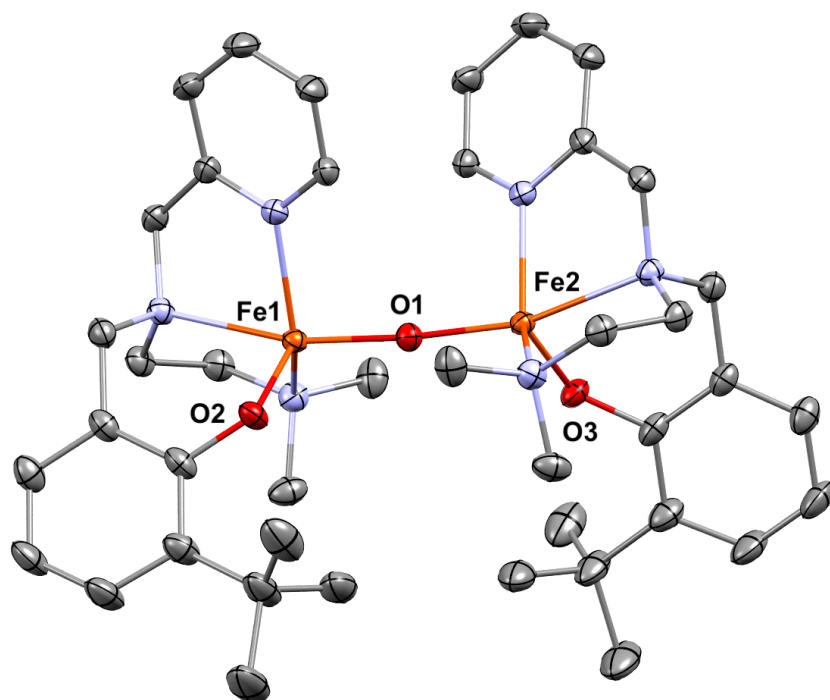

**Figure S22:** ORTEP representations of the crystal structure of ferric  $\mu$ -oxo dimer derived from reactions of **1** and O<sub>2</sub> with ellipsoids drawn at the 50% probability level. H atoms and both triflate counterions were omitted from the figure for clarity.

**Synthesis of  $\text{Fe}_2(\text{N}_3\text{O}_2)\text{-}\mu\text{-O}](\text{OTf})_2$ ,  $\mu\text{-oxo}$  dimer:** An excess (5-minute bubbling) of dry  $\text{O}_2$  gas was added to a solution of 150 mg of **1** in 5ml of dry and degassed acetonitrile (5.5 mM). The color change from green to purple is immediate. The solvent was removed under vacuum, and the resulting purple oily residue was brought into a glove box for workup. The oil was washed 4x with diethyl ether, resulting in a purple residue. This residue was further dried under vacuum for 1 hr. The dry resulting powder was reversed layered with THF as the solvent and Toluene as the anti-solvent. The mixture was allowed to sit for several days in a freezer at a temperature of  $-10^\circ\text{C}$ . After this time, large, rhombic purple crystals resulted.

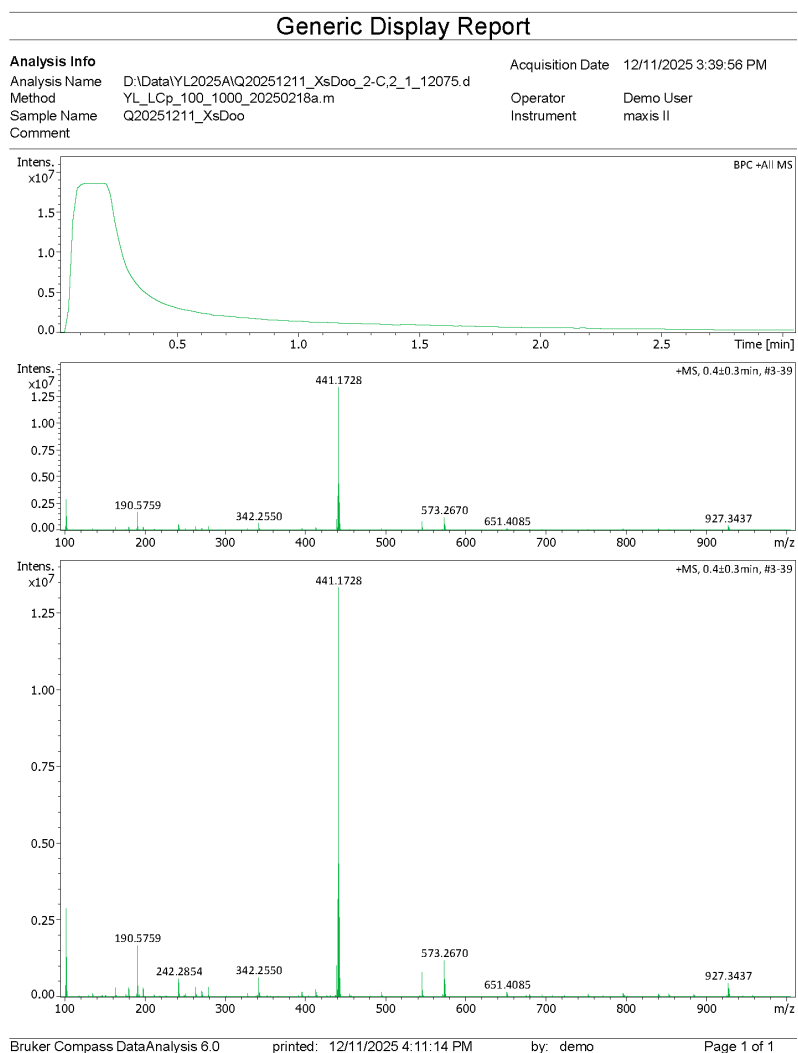

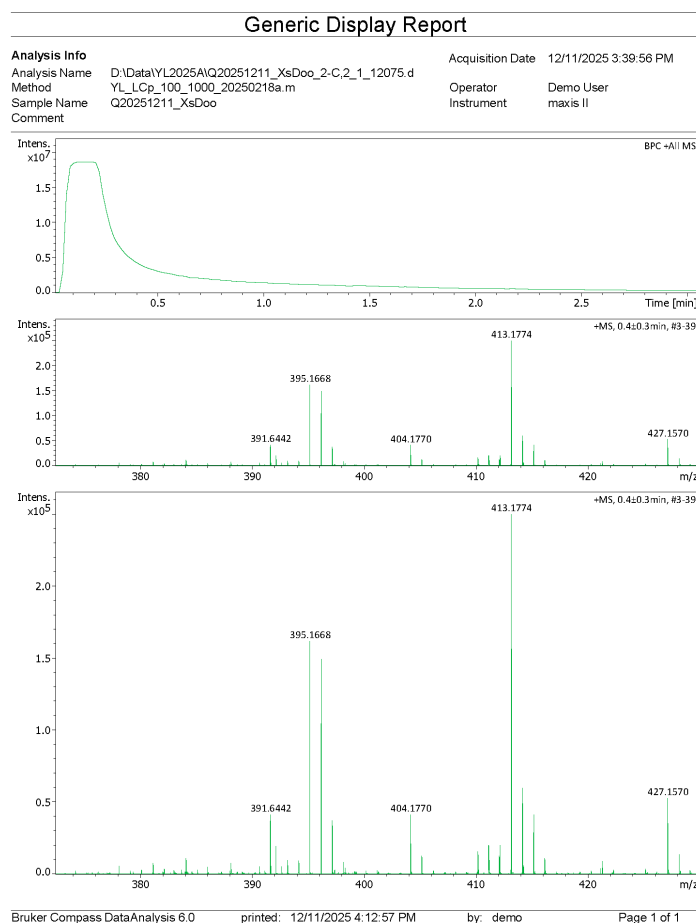

**Image S5:** ESI-MS of ferric  $\mu$ -oxo dimer isolated as a clean powder, which was derived from the reaction of **1** with  $O_2$ . The calculated mass for the ferric  $\mu$ -oxo dimer is 808.6 g/mol, with a charge of +2. The most prominent peak in the ESI (top picture above) shows a peak at 441.1728 m/z and a minor peak at 573.267 m/z. Like the ESI of **1** (Figure S2), and the ferric analogue of **1** (Figure S4). The peak at 441 m/z corresponds to the addition of a mass of 45 mass units, which we attribute to the binding of formate (45 g/mol) to the ferric analogue of **1**. The peak at 573 m/z is not identified. The ferric  $\mu$ -oxo dimer should show a peak m/z (where z +2) at 404 mass units. The bottom set of pictures, above, shows the presence of this peak, albeit at much lower intensity ( $\times 10^5$ ). Additionally, in this same intensity range, we observe a peak at 413 m/z, which corresponds to a gain of 17 mass units. This peak could correspond to a protonated oxo ligand, i.e., hydroxide, bound to a ferric analogue of **1** (charge +1).

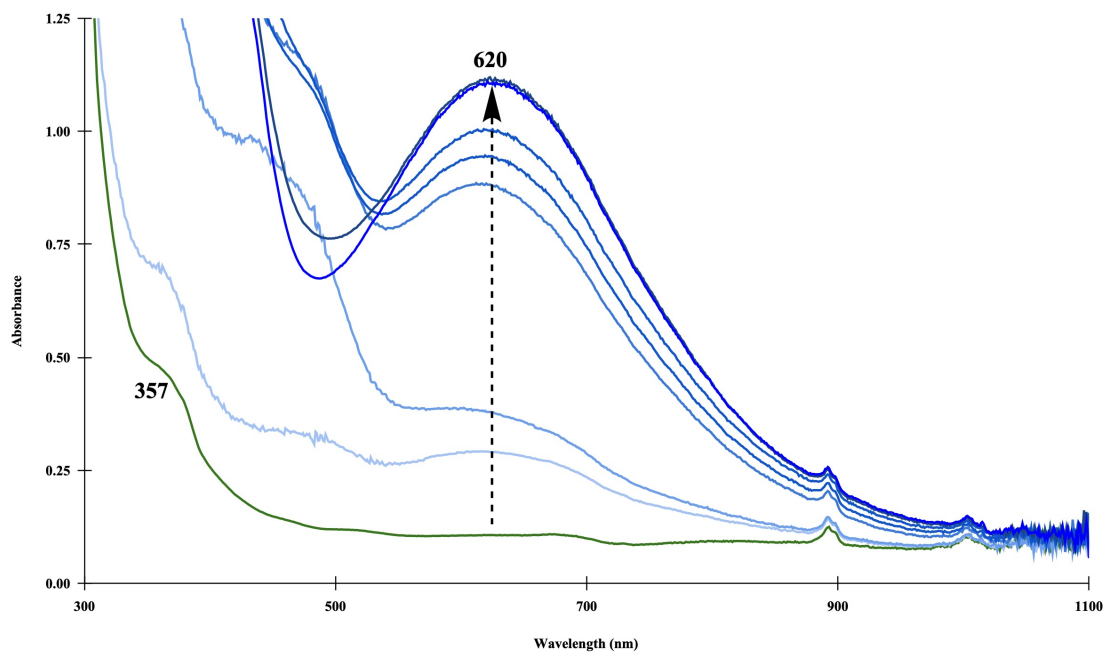

**Figure S23:** Time lapse (10 min), low temperature UV-Visible spectrum of the reaction of **1** with 1 eq. mCPBA at  $-40^{\circ}\text{C}$  in MeCN producing a 620 nm absorption band. This band persists at room temperature.

**A**

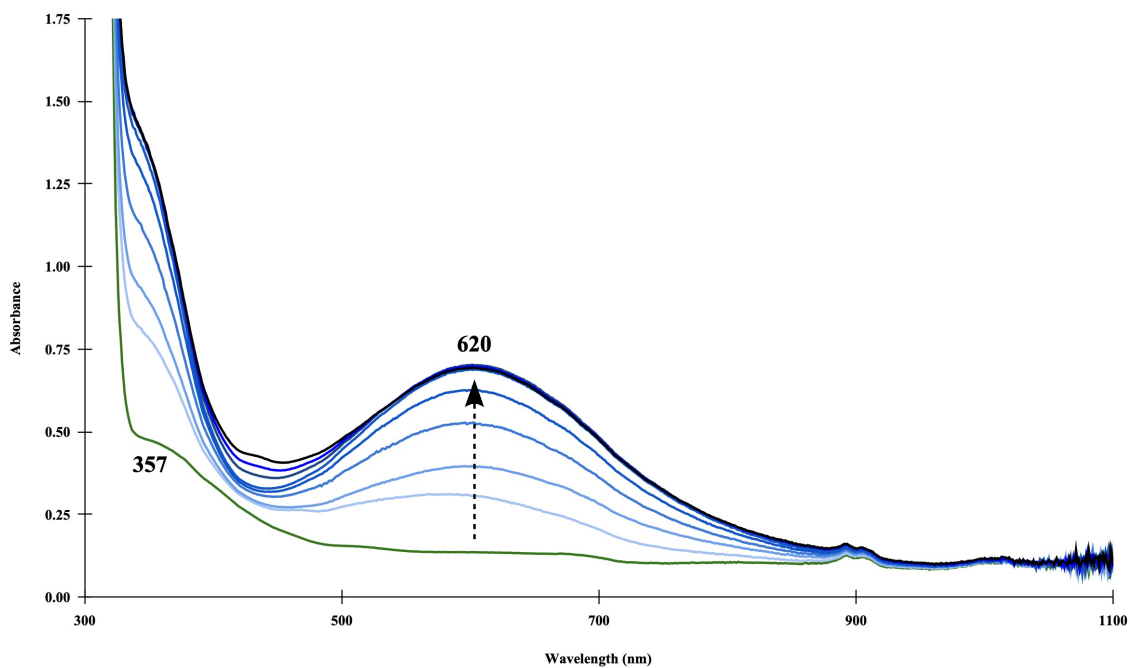

B

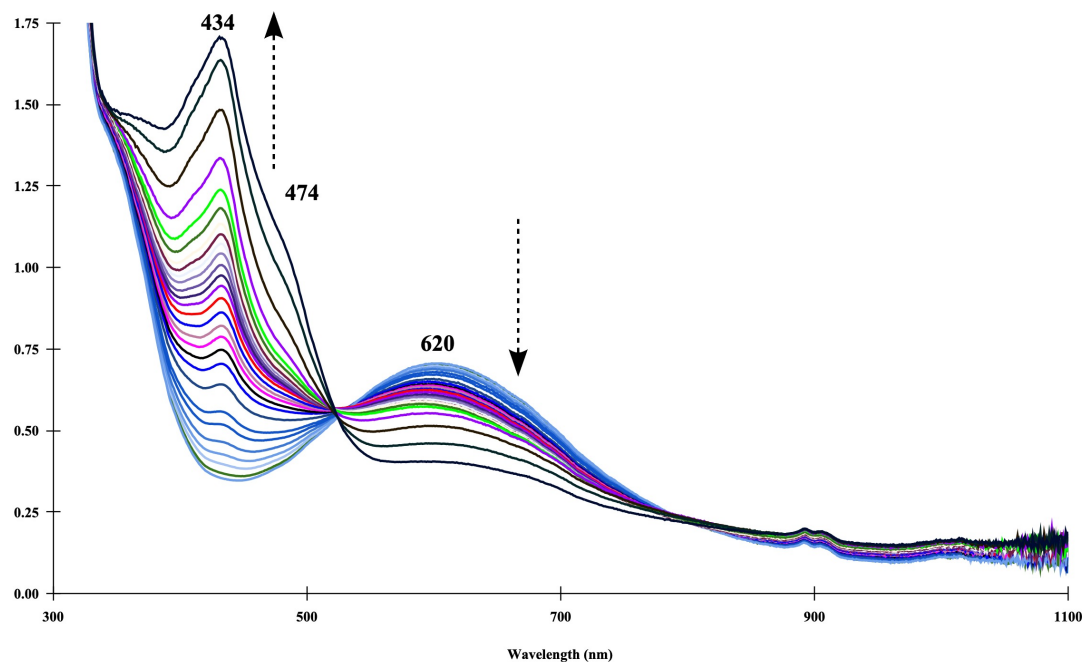

C

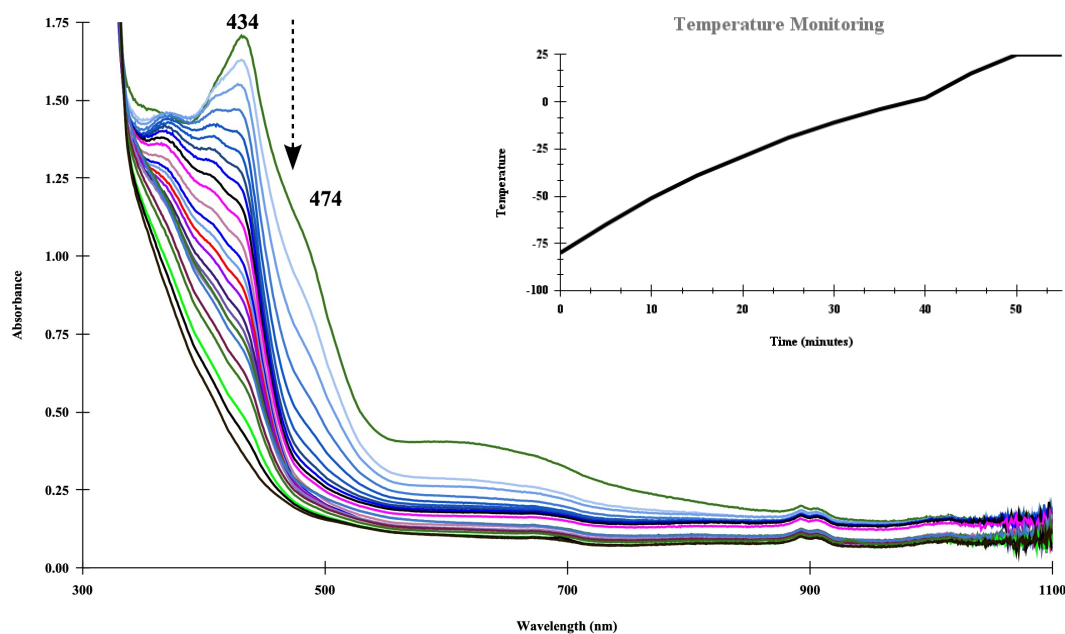

**Figure S24:** Time lapse (90 min), low temperature UV-Visible spectrum of the reaction of **1** with 6 eq. mCPBA at  $-80^{\circ}\text{C}$  in Acetone. **A.** Initial growth phase (time = 6 min.). This phase presumably corresponds to the formation of a 1-electron oxidized ferric species. Consistent with our observations in the experiments depicted in figures S18-20. **B.** The

ferric species undergoes an isosbestic transformation to a second transient species with intense absorption bands at 434 and 474 (sh) nm. **C.** Monitoring of the warming of the solution over the course of 60 min. when the reaction was gradually warmed up to room temperature (inset plot of time vs. temperature change). The intermediate from part **B** decays entirely during this time.

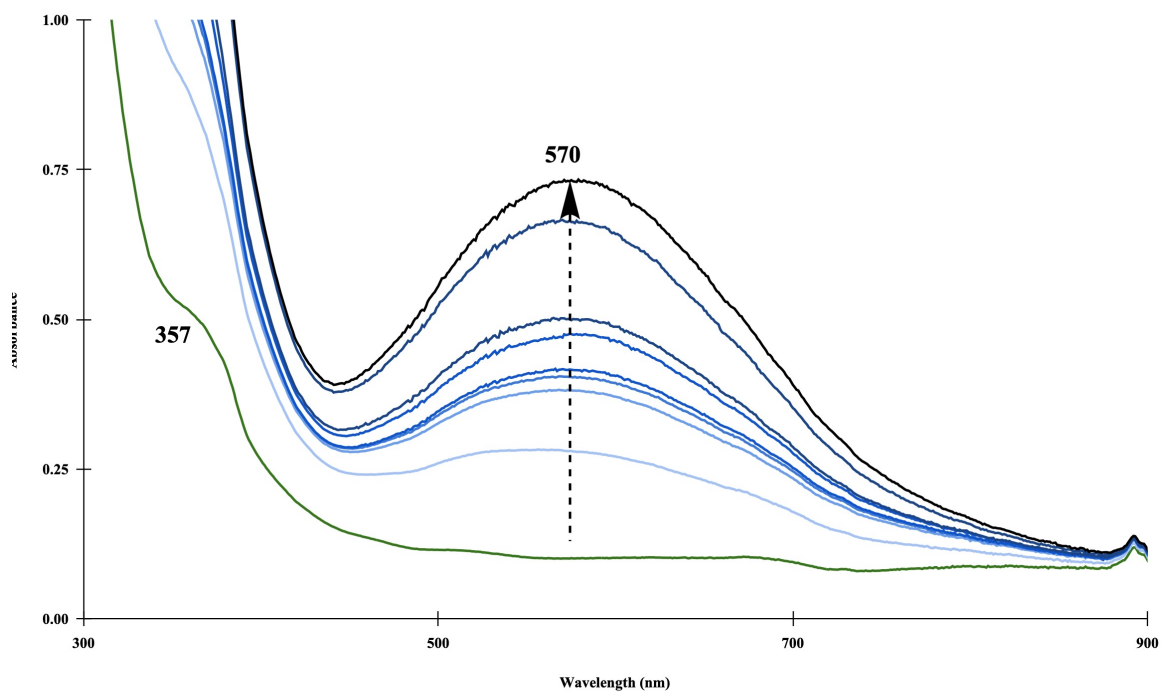

**Figure S25:** Time lapse (2.5 min), low temperature UV-Visible spectrum of the reaction of **1** with excess  $\text{O}_2$  at  $-40^\circ\text{C}$  in MeCN.

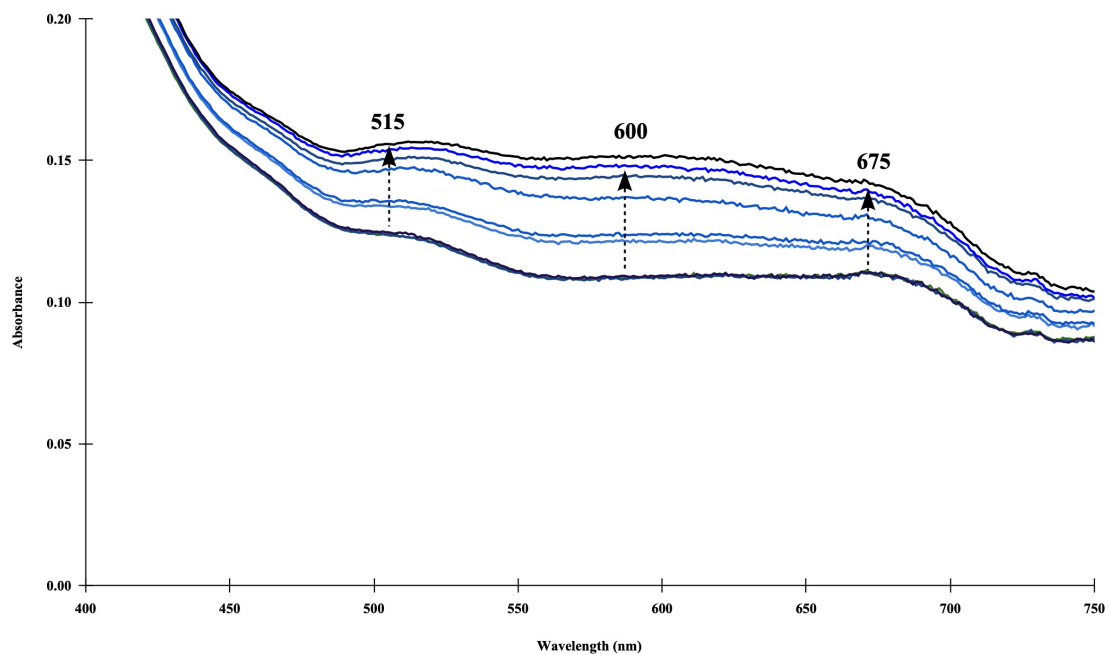

**Figure S26:** Time lapse (2.5 min), low temperature UV-Visible spectrum of the reaction of **1** with 0.5 eq.  $O_2$  at  $-40^\circ C$  in MeCN.

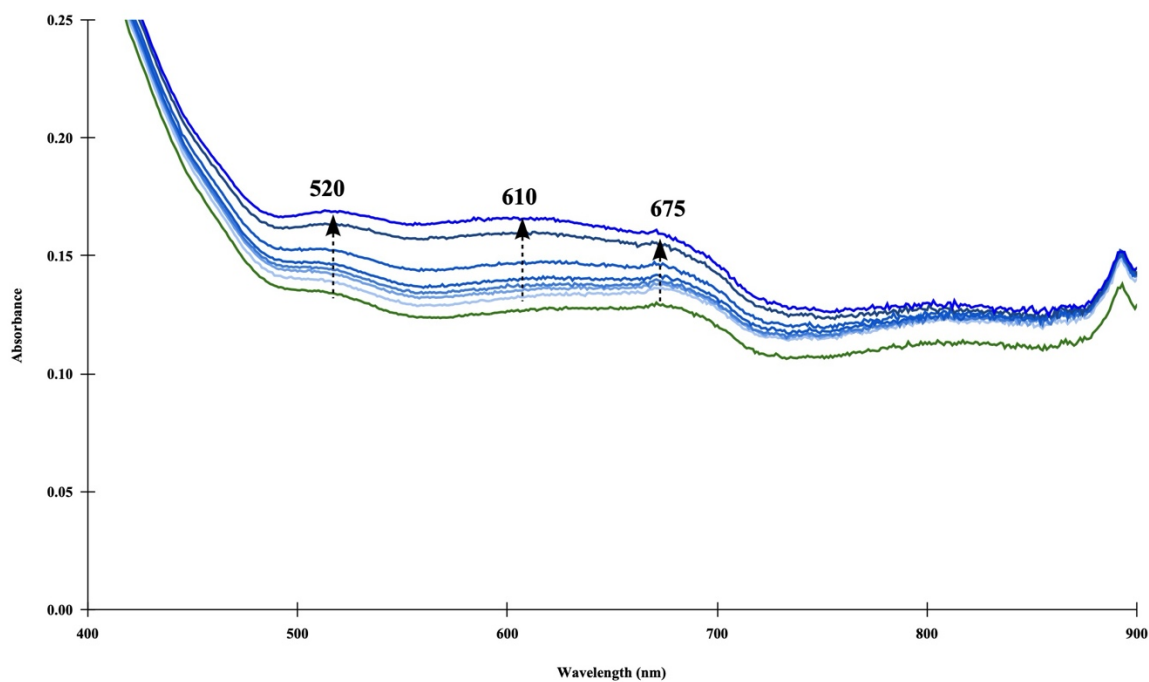

**Figure S27:** Time lapse (20 min), low temperature UV-Visible spectrum of the reaction of **1** with 1 eq.  $O_2$  at  $-80^\circ C$  in acetone.



## Computational calculations

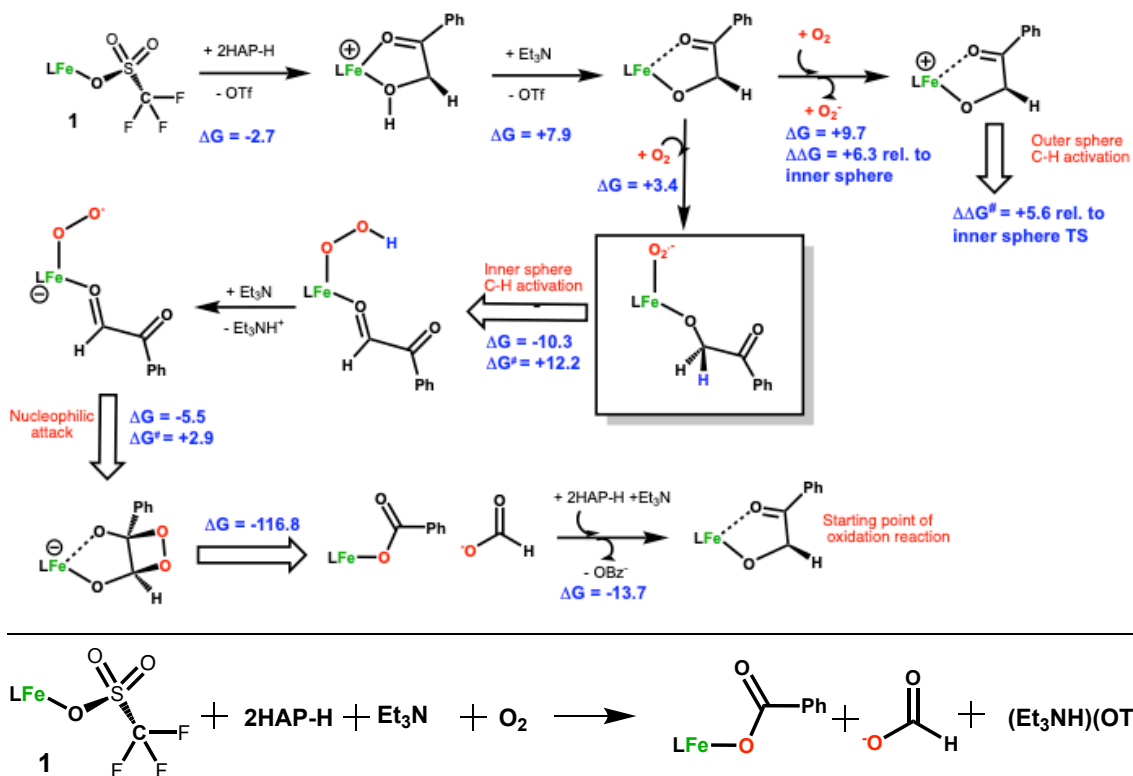

**Figure S28.** Proposed DFT-derived mechanism of  $\text{O}_2$  activation and C-C bond cleaving of 2-HAPH. The balanced chemical equation for the reaction was added for clarity.

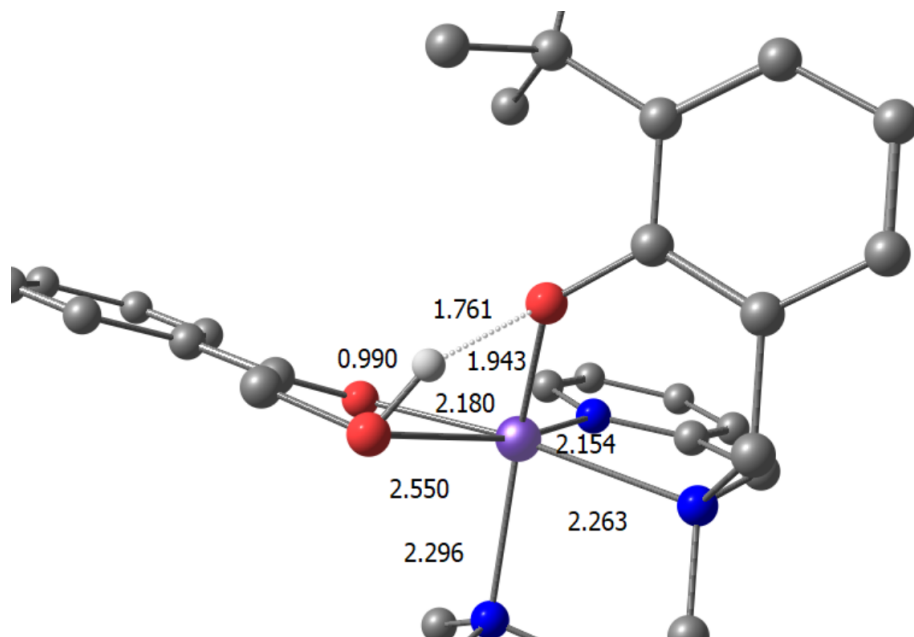

**Figure S29.** Core geometry of cationic,  $S = 2$ ,  $\text{Fe}(\text{N}_3\text{O})(2\text{HAPH})$  complex.

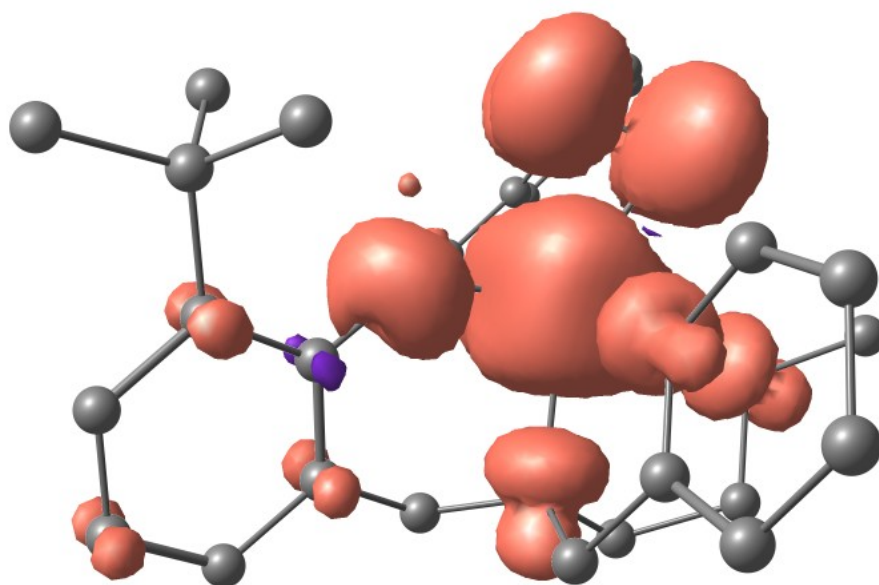

**Figure S30:** Calculated spin density (IsoValue = 0.002 a.u.) for the Fe<sup>III</sup>-superoxide complex (orange envelope indicates positive spin density).

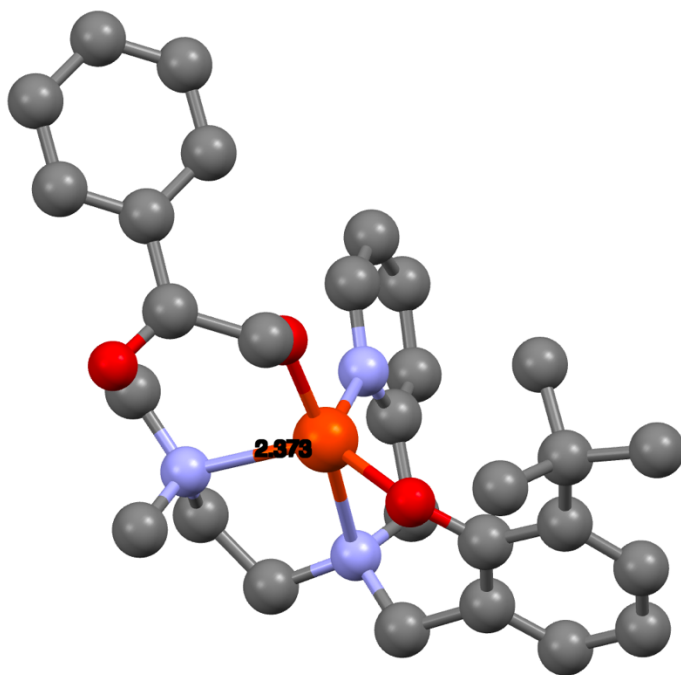

**Figure S31:** Calculated geometry for 1 bound to 2HAP<sup>-</sup> in a k-1 configuration. The bond length between the Fe(II) and the NMe<sub>2</sub> moiety of the ligand is 2.373 Å.

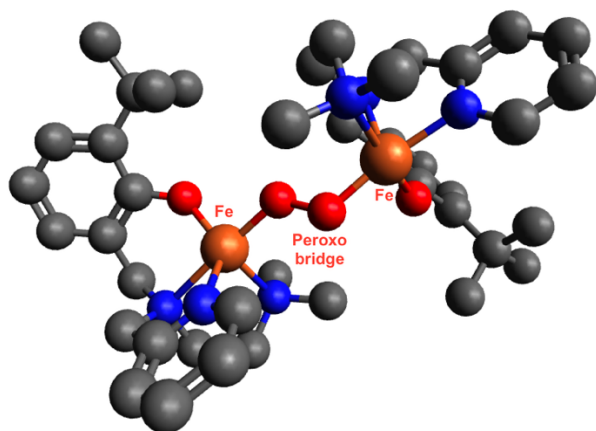

A.

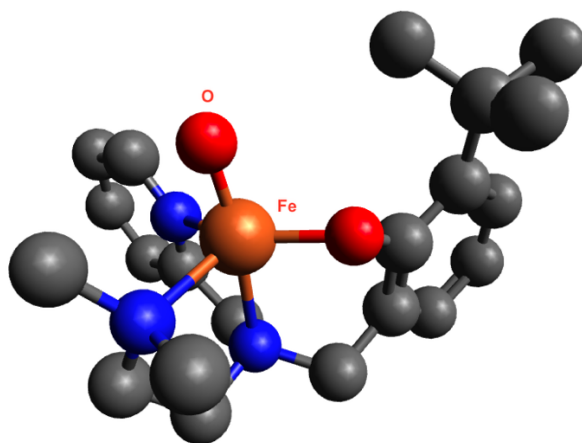

B.

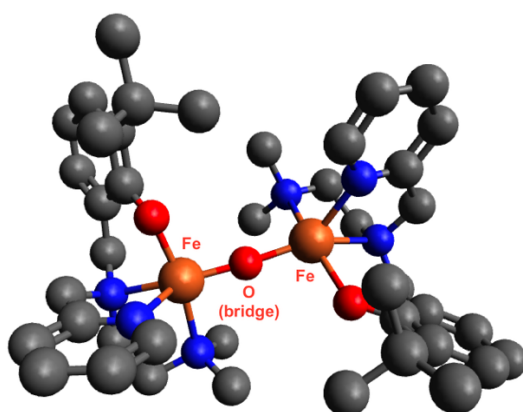

C.

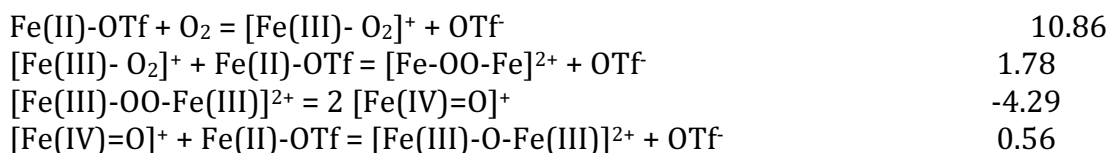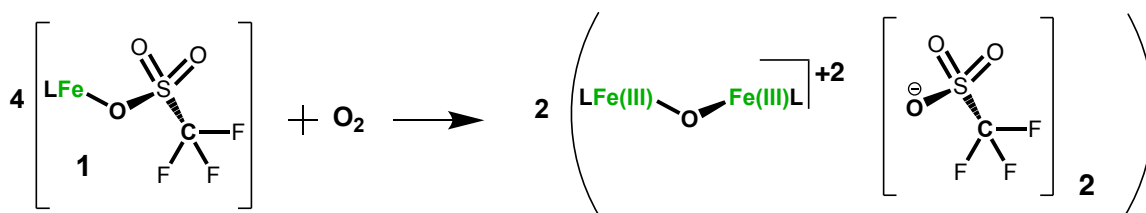

**Figure S32:** Calculated structures for the key intermediates resulting from the reaction between compound **1** and  $\text{O}_2$ . **A.**  $\text{Fe(III)-OO-Fe(III)}$  ( $\mu$ -peroxo dimer), **B.**  $\text{Fe(IV)=O}$ , and **C.**  $\text{Fe(III)-O-Fe(III)}$  ( $\mu$ -oxo dimer). Corresponding  $\Delta G$  values in kcal/mol for each of the balanced reactions in the proposed mechanism towards the formation of the final product (ferric- $\mu$ -oxo dimer). The balanced chemical equation for the reaction was added for clarity.

## X-ray crystallographic studies

**Experimental description:** A single crystal of **1** was mounted under mineral oil on a Mitegen micromount and immediately placed in a cold nitrogen stream prior to data collection. The single crystal data was collected on a Bruker D8 Quest equipped with a Photon 3 CMOS detector and a Mo ImS source. Data were collected using a combination of phi and omega scans and integrated with the Bruker SAINT program. Structure solution was performed using the SHELXTL software suite. Intensities were corrected for Lorentz and polarization effects and an empirical absorption correction was applied using SADABS v2014/4. Non-hydrogen atoms were refined with anisotropic thermal parameters and hydrogen atoms were included in riding idealized positions.

**Table S1:**

|                                   |                                                       |
|-----------------------------------|-------------------------------------------------------|
| Empirical formula                 | C22 H30 F3 Fe N3 O4 S                                 |
| Formula weight                    | 545.40                                                |
| Temperature                       | 100(2) K                                              |
| Wavelength                        | 0.71073 Å                                             |
| Crystal system                    | Triclinic                                             |
| Space group                       | P-1                                                   |
| Unit cell dimensions              | a = 9.4612(15) Å                      a = 81.071(3)°. |
| b = 17.394(3) Å                   | b = 86.400(4)°.                                       |
| c = 22.774(2) Å                   | g = 82.258(4)°.                                       |
| Volume                            | 3665.3(9) Å <sup>3</sup>                              |
| Z                                 | 6                                                     |
| Density (calculated)              | 1.483 Mg/m <sup>3</sup>                               |
| Absorption coefficient            | 0.759 mm <sup>-1</sup>                                |
| F(000)                            | 1704                                                  |
| Crystal size                      | 0.190 x 0.152 x 0.086 mm <sup>3</sup>                 |
| Theta range for data collection   | 2.174 to 28.366°.                                     |
| Index ranges                      | -12 ≤ h ≤ 12, -23 ≤ k ≤ 23, -30 ≤ l ≤ 29              |
| Reflections collected             | 218409                                                |
| Independent reflections           | 18292 [R(int) = 0.0651]                               |
| Completeness to theta = 25.242°   | 99.9 %                                                |
| Absorption correction             | Semi-empirical from equivalents                       |
| Max. and min. transmission        | 0.95472 and 0.89900                                   |
| Refinement method                 | Full-matrix least-squares on F <sup>2</sup>           |
| Data / restraints / parameters    | 18292 / 1746 / 1128                                   |
| Goodness-of-fit on F <sup>2</sup> | 1.024                                                 |
| Final R indices [I > 2σ(I)]       | R1 = 0.0340, wR2 = 0.0734                             |
| R indices (all data)              | R1 = 0.0536, wR2 = 0.0816                             |
| Extinction coefficient            | n/a                                                   |
| Largest diff. peak and hole       | 0.752 and -0.578 e.Å <sup>-3</sup>                    |

**Crystallographic refinement details for 1:** A structural model consisting of three crystallographically independent molecules of **1** per asymmetric unit was developed. The CH<sub>2</sub>CH<sub>2</sub>NMe<sub>2</sub> arm of one ligand is disordered over two orientations. The like C-C and C-N distances were restrained to be similar (esd 0.02 Å). The triflate anions on the other two independent molecules are disordered over two orientations. The like C-F, C-S and S-O distances were restrained to be similar (esd 0.02 Å). Rigid-bond restraints were imposed on displacement parameters for all disordered sites and similar displacement amplitudes (esd 0.01) were imposed on disordered sites overlapping by less than the sum of van der Waals radii.

**CCDC deposition number:** 2486757

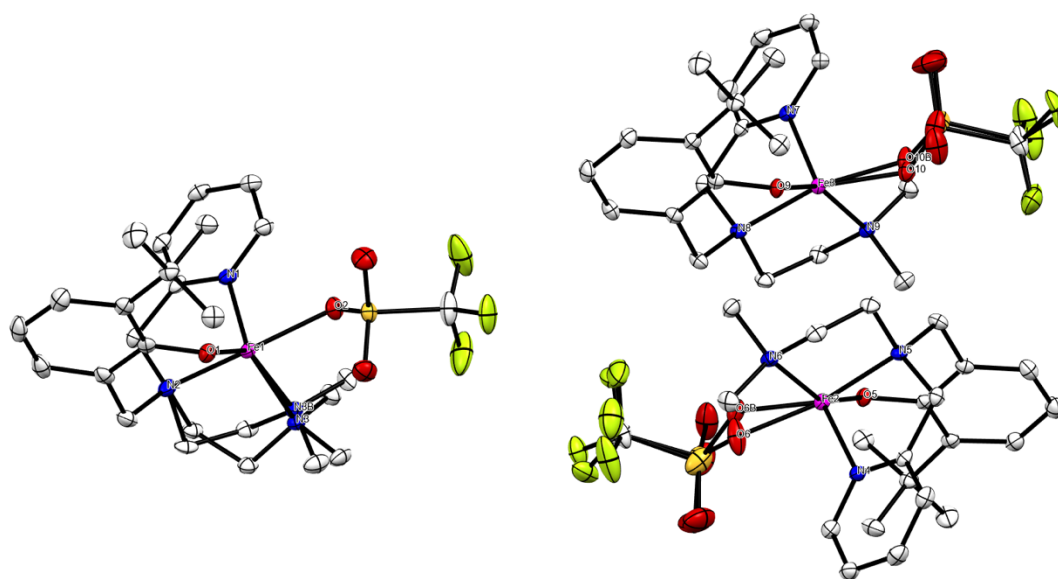

**Figure S33:** ORTEP representations of the crystal structure of [Fe(II)(NMe<sub>2</sub>-6H-Py-2-t-ButPhOH)(OTf)] (**1**) with ellipsoids drawn at the 50% probability level. H atoms are omitted for clarity. All the orientations and corresponding disorders from the original structure are shown.

**Experimental description:** A single crystal of purple **ferric  $\mu$ -oxo dimer** was mounted under mineral oil on a Mitegen micromount and immediately placed in a cold nitrogen stream before data collection. The single crystal data was collected on a Bruker Apex DUO equipped with an ApexII CCD detector and a Mo fine-focus sealed source. Data were collected using a combination of phi and omega scans and integrated with the Bruker SAINT program. Structure solution was performed using the SHELXTL software suite. Intensities were corrected for Lorentz and polarization effects and an empirical absorption correction was applied using SADABS v2014/4. Non-hydrogen atoms were refined with

anisotropic thermal parameters and hydrogen atoms were included in riding idealized positions.

A structural model consisting of the host plus approximately seven highly disordered toluene solvate molecules per unit cell was developed; however, positions for the idealized solvate molecules were poorly determined. Since positions for the solvate molecules were poorly determined, a second structural model was refined with contributions from the solvate molecules removed from the diffraction data using the bypass procedure in PLATON. No positions for the host network differed by more than two  $\sigma$ 's between these two refined models. The electron count from the "squeeze" model converged in good agreement with the number of solvate molecules predicted by the complete refinement. The "squeeze" data are reported here.

The triflate anion is disordered over two orientations. The like S-O, S-C, and C-F distances were restrained to be similar (esd 0.01 Å). Similar displacement amplitudes (esd 0.01) were imposed on disordered sites overlapping by less than the sum of van der Waals radii.

**CCDC deposition number:** 2515966

**Table S2.** Crystal data and structure refinement for ferric- $\mu$ -oxo dimer.

|                        |                                                                                                             |          |
|------------------------|-------------------------------------------------------------------------------------------------------------|----------|
| Identification code    | 25226_a_sq                                                                                                  |          |
| Empirical formula      | C <sub>44</sub> H <sub>60</sub> F <sub>6</sub> Fe <sub>2</sub> N <sub>6</sub> O <sub>9</sub> S <sub>2</sub> |          |
| Formula weight         | 1106.80                                                                                                     |          |
| Temperature            | 100(2) K                                                                                                    |          |
| Wavelength             | 0.71073 Å                                                                                                   |          |
| Crystal system         | Tetragonal                                                                                                  |          |
| Space group            | P4 <sub>2</sub> /n                                                                                          |          |
| Unit cell dimensions   | a = 16.4628(11) Å                                                                                           | a = 90°. |
|                        | b = 16.4628(11) Å                                                                                           | b = 90°. |
|                        | c = 22.7913(16) Å                                                                                           | c = 90°. |
| Volume                 | 6177.0(9) Å <sup>3</sup>                                                                                    |          |
| Z                      | 4                                                                                                           |          |
| Density (calculated)   | 1.190 Mg/m <sup>3</sup>                                                                                     |          |
| Absorption coefficient | 0.603 mm <sup>-1</sup>                                                                                      |          |
| F(000)                 | 2304                                                                                                        |          |
| Crystal size           | 0.292 x 0.098 x 0.091 mm <sup>3</sup>                                                                       |          |

|                                   |                                             |
|-----------------------------------|---------------------------------------------|
| Theta range for data collection   | 1.964 to 25.384°.                           |
| Index ranges                      | -19≤h≤19, -19≤k≤19, -27≤l≤27                |
| Reflections collected             | 89663                                       |
| Independent reflections           | 5674 [R(int) = 0.0638]                      |
| Completeness to theta = 25.242°   | 99.9 %                                      |
| Absorption correction             | Semi-empirical from equivalents             |
| Max. and min. transmission        | 0.97387 and 0.91205                         |
| Refinement method                 | Full-matrix least-squares on F <sup>2</sup> |
| Data / restraints / parameters    | 5674 / 199 / 390                            |
| Goodness-of-fit on F <sup>2</sup> | 1.052                                       |
| Final R indices [I>2sigma(I)]     | R1 = 0.0368, wR2 = 0.0966                   |
| R indices (all data)              | R1 = 0.0511, wR2 = 0.1037                   |
| Extinction coefficient            | n/a                                         |
| Largest diff. peak and hole       | 0.321 and -0.270 e.Å <sup>-3</sup>          |
